# Supplementary material for: A general and practical route to 4,5-disubstituted oxazoles using acid chlorides and isocyanides
Source: Royal Society of Chemistry journal article supplement (doi:10.1039/c5ra07668d), 2015-01-01

## Supporting Information

### A general and practical route to 4,5-Disubstituted Oxazoles using Acid chlorides and Isocyanides

Dipak Kumar Tiwari, Jaya Pogula and Dharmendra Kumar Tiwari\*

Inorganic and Physical Chemistry Division, Indian Institute of Chemical Technology,

Tarnaka, Hyderabad-500007 (India)

Email: [dktiwari@iict.res.in](mailto:dktiwari@iict.res.in) & [dk80.org@gmail.com](mailto:dk80.org@gmail.com)

| Table of Contents                                   | Page No |
|-----------------------------------------------------|---------|
| Experimental procedure                              | 2       |
| <sup>1</sup> H and <sup>13</sup> C NMR of <b>1a</b> | 3       |
| <sup>1</sup> H and <sup>13</sup> C NMR of <b>1b</b> | 4       |
| <sup>1</sup> H and <sup>13</sup> C NMR of <b>1c</b> | 5       |
| <sup>1</sup> H and <sup>13</sup> C NMR of <b>2a</b> | 6       |
| <sup>1</sup> H and <sup>13</sup> C NMR of <b>2b</b> | 7       |
| <sup>1</sup> H and <sup>13</sup> C NMR of <b>2c</b> | 8       |
| <sup>1</sup> H and <sup>13</sup> C NMR of <b>3a</b> | 9       |
| <sup>1</sup> H and <sup>13</sup> C NMR of <b>3b</b> | 10      |
| <sup>1</sup> H and <sup>13</sup> C NMR of <b>3c</b> | 11      |
| <sup>1</sup> H and <sup>13</sup> C NMR of <b>4a</b> | 12      |
| <sup>1</sup> H and <sup>13</sup> C NMR of <b>4b</b> | 13      |
| <sup>1</sup> H and <sup>13</sup> C NMR of <b>4c</b> | 14      |
| <sup>1</sup> H and <sup>13</sup> C NMR of <b>5a</b> | 15      |
| <sup>1</sup> H and <sup>13</sup> C NMR of <b>5b</b> | 16      |
| <sup>1</sup> H and <sup>13</sup> C NMR of <b>5c</b> | 17      |
| <sup>1</sup> H and <sup>13</sup> C NMR of <b>6a</b> | 18      |
| <sup>1</sup> H and <sup>13</sup> C NMR of <b>6b</b> | 19      |
| <sup>1</sup> H and <sup>13</sup> C NMR of <b>6c</b> | 20      |
| <sup>1</sup> H and <sup>13</sup> C NMR of <b>7</b>  | 21      |
| <sup>1</sup> H and <sup>13</sup> C NMR of <b>8</b>  | 22      |
| <sup>1</sup> H and <sup>13</sup> C NMR of <b>10</b> | 23      |

**Controlled [3+2] cycloaddition reaction of isocyanide with phenoxy acetylchloride:**

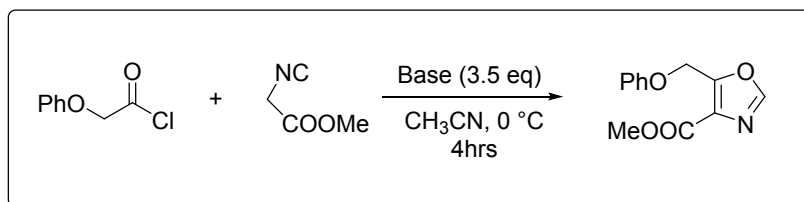

**Experimental procedure:** A solution of phenoxy acetylchloride **3**, (0.07 mL, 0.5 mmol) in dry CH<sub>3</sub>CN (2 mL) was slowly added to a mixture of methyl 2-isocyanoacetate (0.05 mL, 0.5 mmol) and Base (1.75 mmol) in dry CH<sub>3</sub>CN (4 mL) at 0 °C. The reaction mixture was allowed to stir for additional 4 hrs and at the same temperature and then allowed to attain room temperature. The reaction mixture was quenched with water (6 mL) and the mixture was diluted with ethylacetate (10 mL). The organic layer was separated and washed with aqueous NaHCO<sub>3</sub> solution (5 mL) and brine (5 mL). The organic layer was dried over anhydrous sodium sulphate and solvent was removed under reduced pressure to produce crude 4,5-disubstituted oxazole, which was on purification using 100-200 mesh silica gel, gave pure 4,5-disubstituted oxazoles good yields.

Table-1 Optimization of reaction condition with different bases

| S.No | Base (3.5 equiv.)               | solvent            | Temp/°C | Time/hrs | Isolated yields <sup>b</sup> |
|------|---------------------------------|--------------------|---------|----------|------------------------------|
| 1    | CS <sub>2</sub> CO <sub>3</sub> | CH <sub>3</sub> CN | 0 °C    | 4 hrs    | 58%                          |
| 2    | K <sub>2</sub> CO <sub>3</sub>  | CH <sub>3</sub> CN | 0 °C    | 4 hrs    | 69%                          |
| 3    | <i>t</i> -BuOK                  | CH <sub>3</sub> CN | 0 °C    | 4 hrs    | 77%                          |
| 4    | Et <sub>3</sub> N               | CH <sub>3</sub> CN | 0 °C    | 4hrs     | 75%                          |
| 5    | KOH                             | CH <sub>3</sub> CN | 0 °C    | 4 hrs    | 64%                          |
| 6    | NaOMe                           | CH <sub>3</sub> CN | 0 °C    | 4 hrs    | 68%                          |

<sup>a</sup> The reaction was carried out with 0.5 mmol of acid chlorides (**2-5**), 0.5 mmol of methyl 2-isocyanide (**2a'**) in the presence of base (3.5 equiv) in 3 mL of CH<sub>3</sub>CN for 4-6 hrs; <sup>b</sup> Isolated yield.

# <sup>1</sup>H and <sup>13</sup>C NMR of (1a)

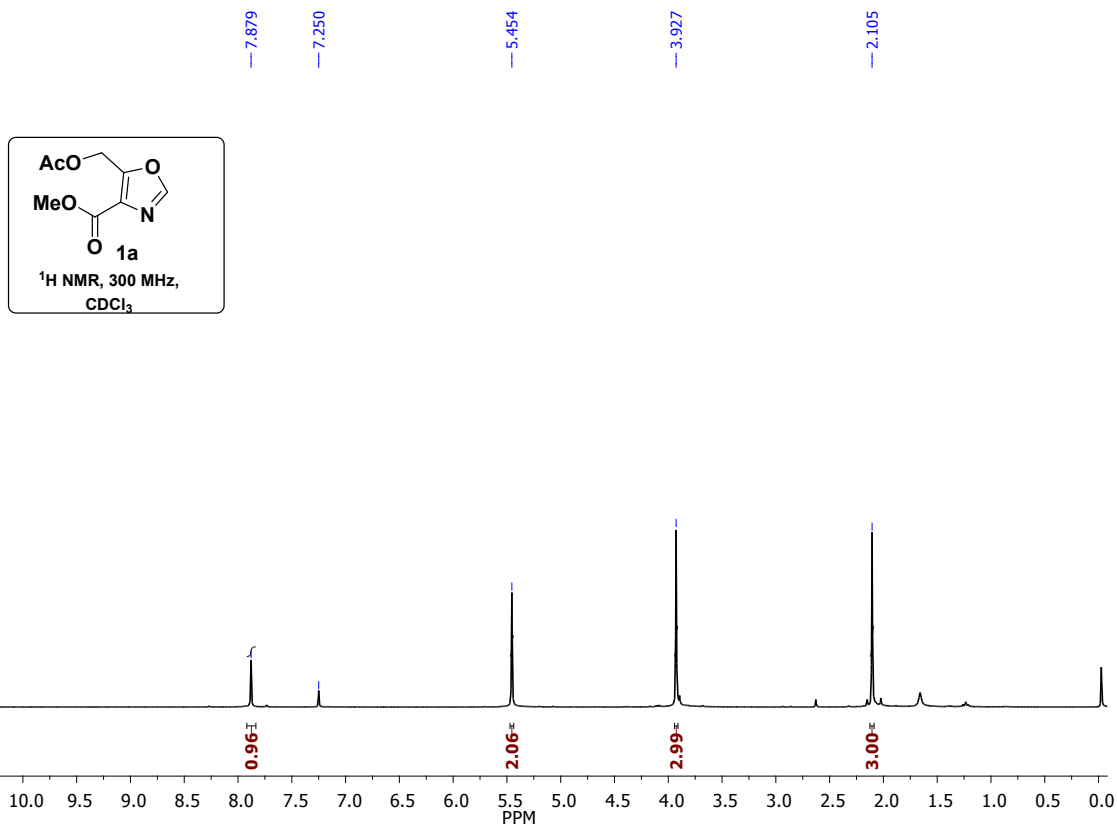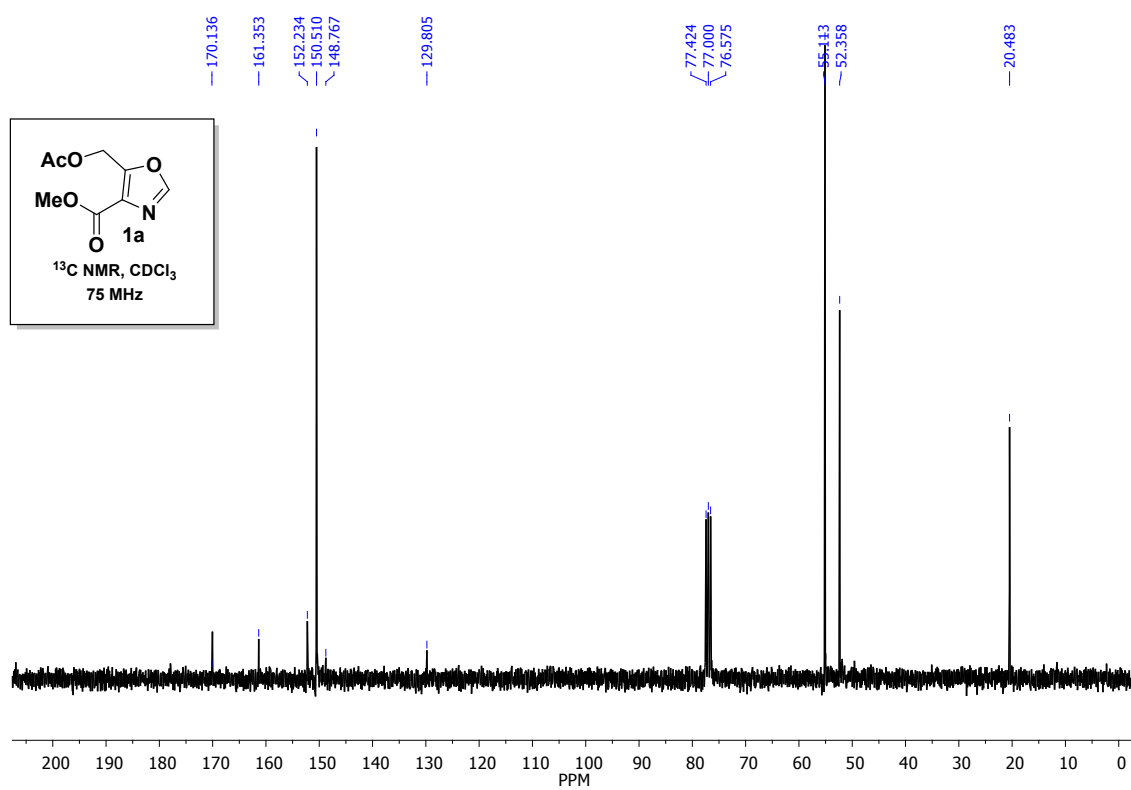

# <sup>1</sup>H and <sup>13</sup>C NMR of (1b)

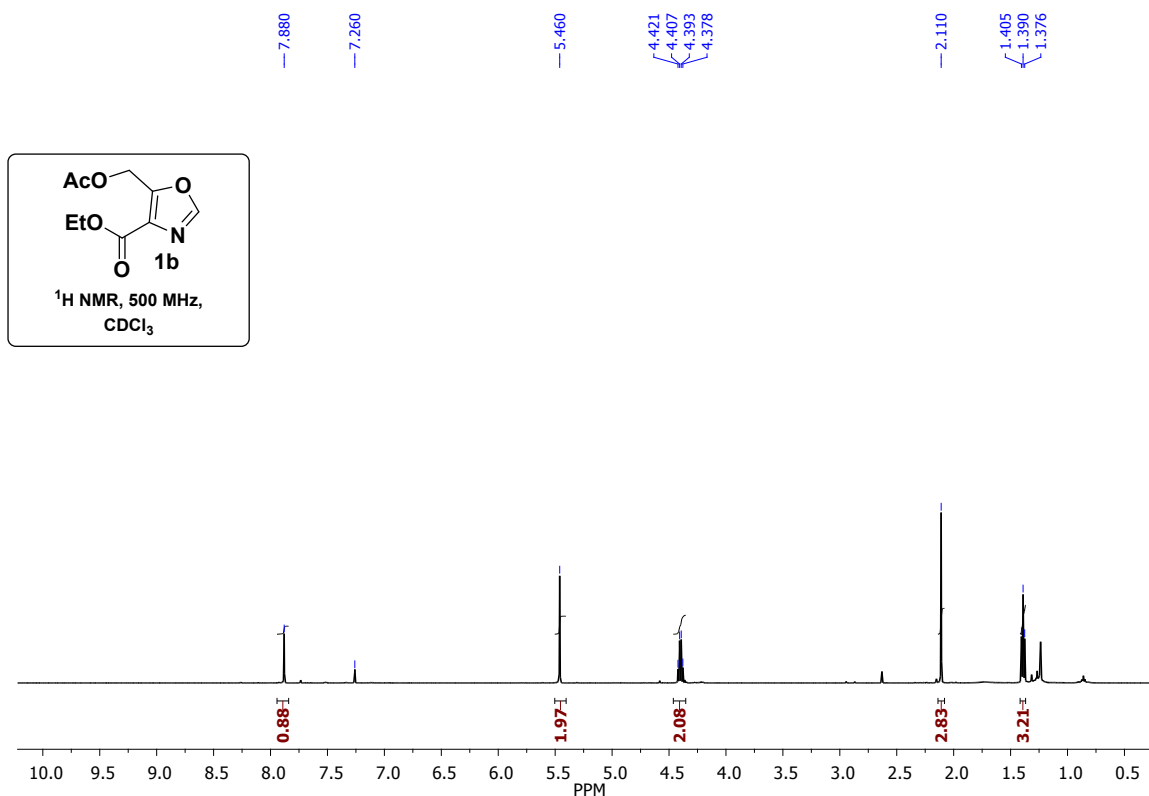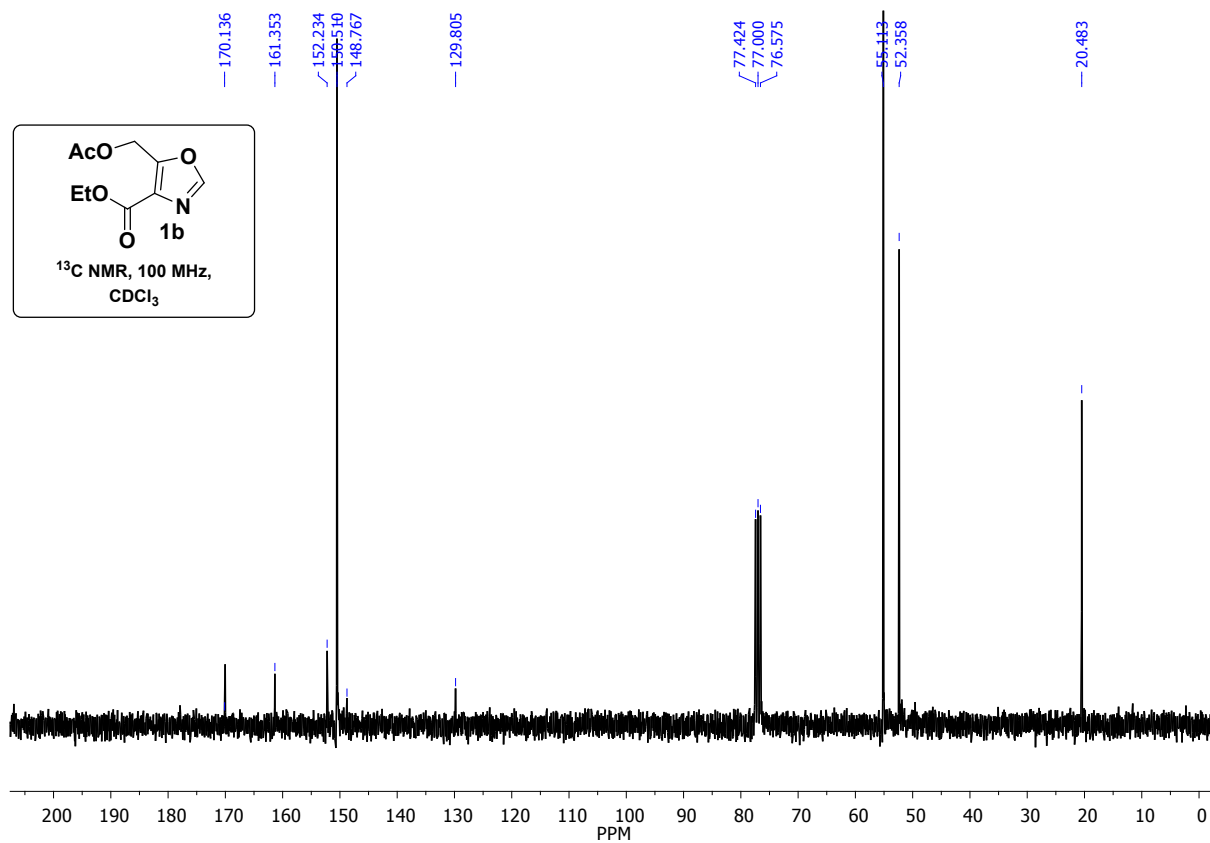

# <sup>1</sup>H and <sup>13</sup>C NMR of (1c)

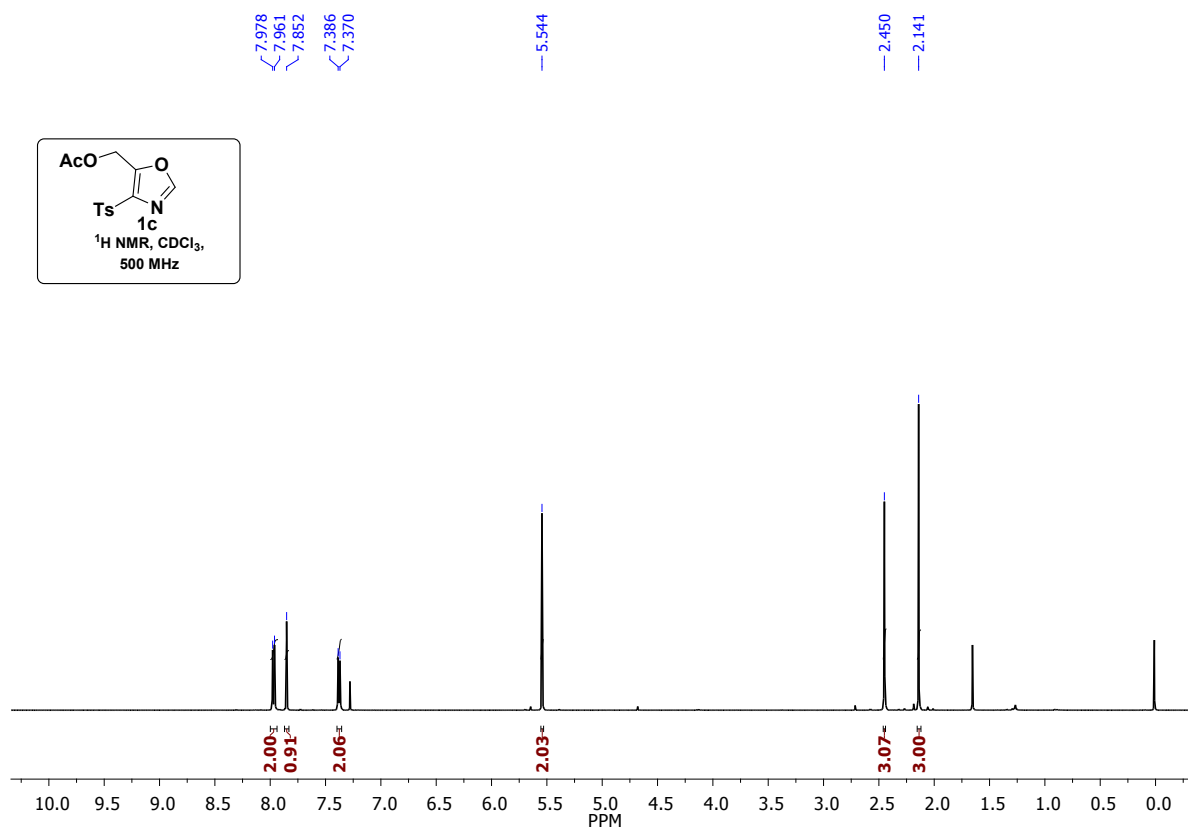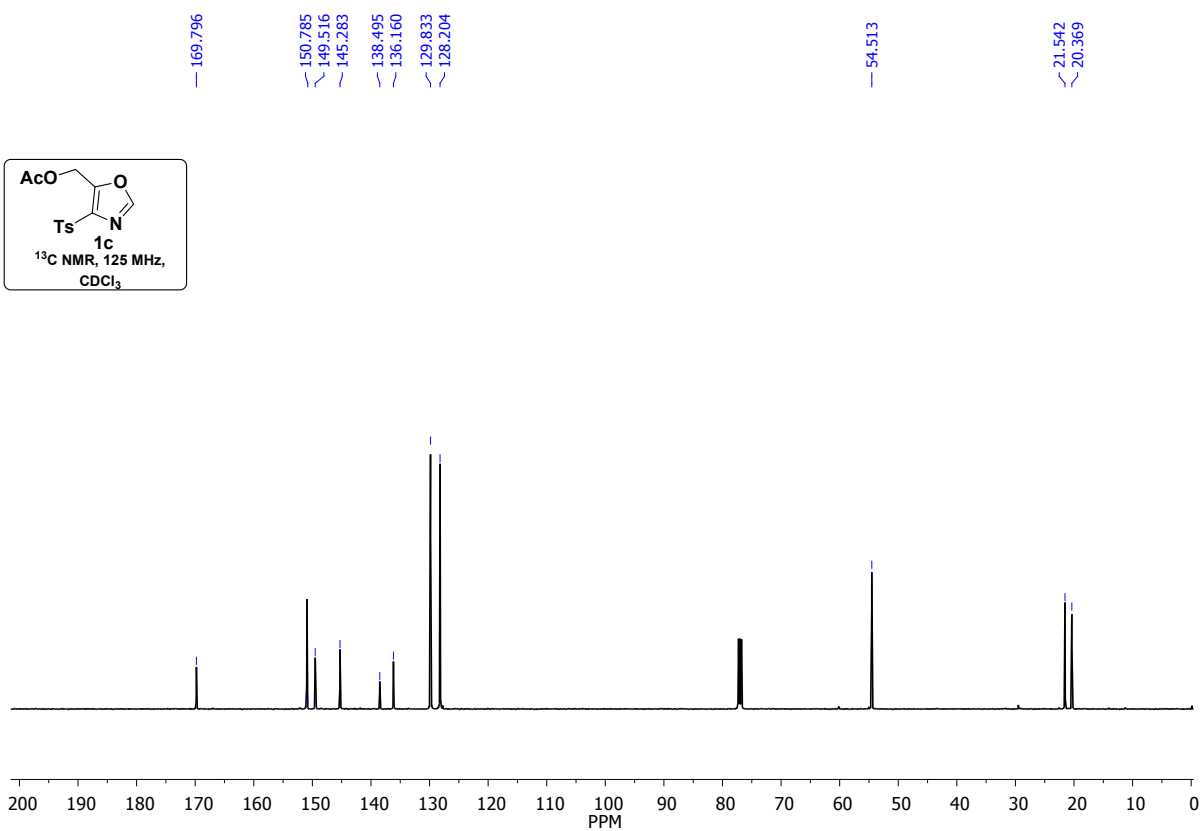

# <sup>1</sup>H and <sup>13</sup>C NMR of (2a)

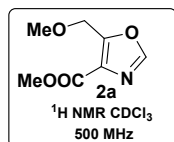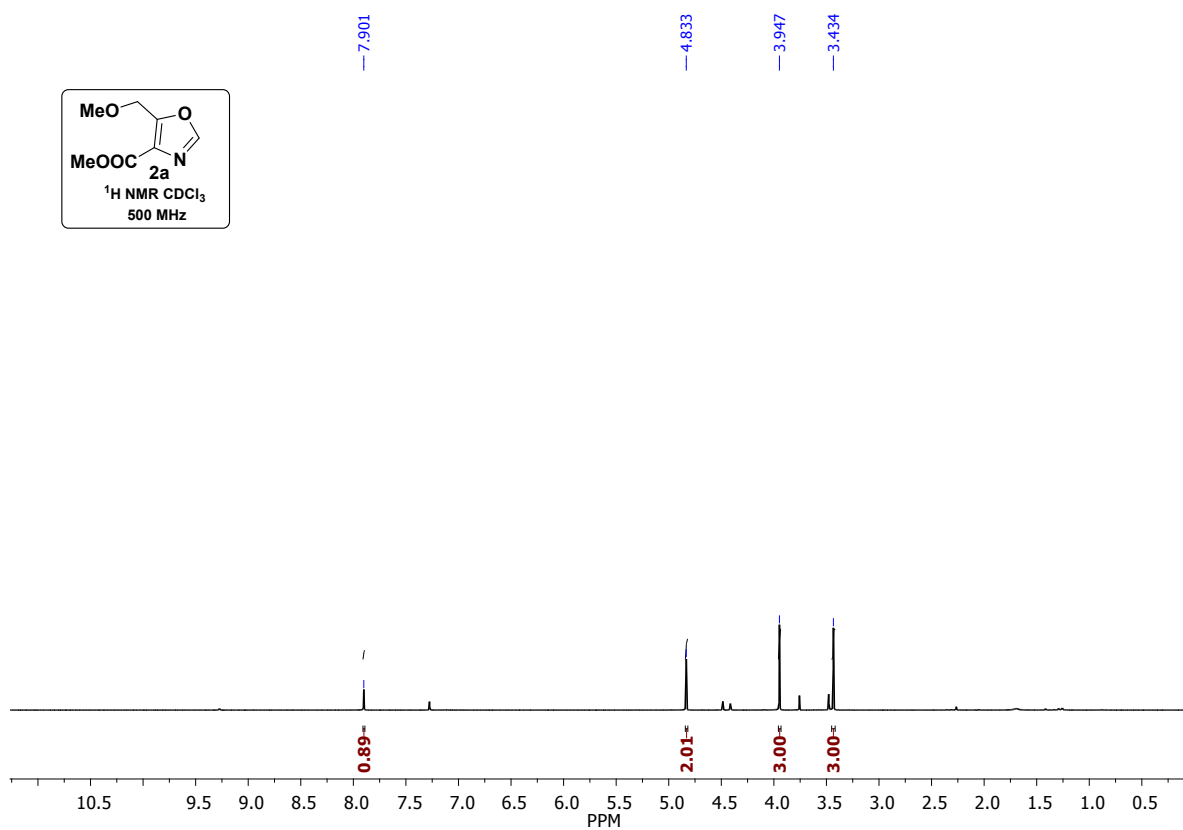

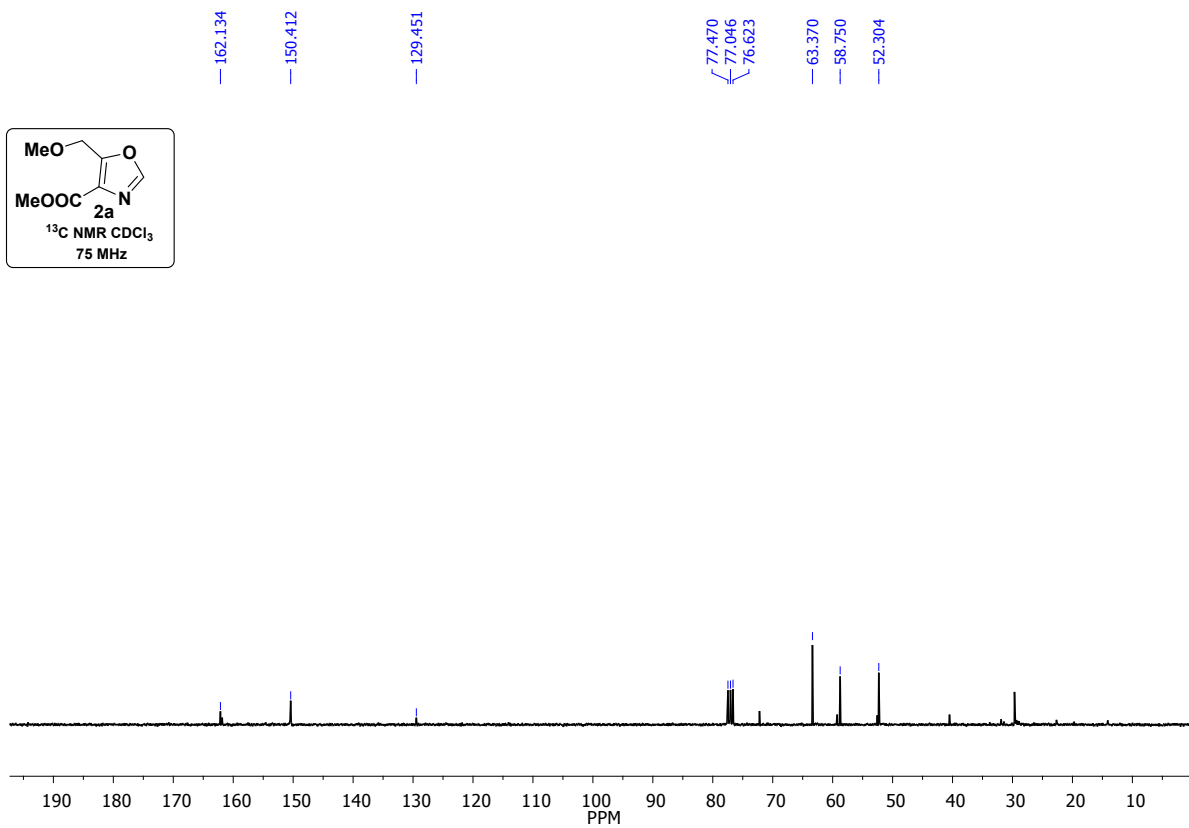

$^1\text{H}$  and  $^{13}\text{C}$  NMR of (**2b**)

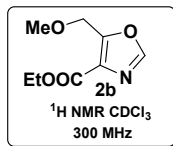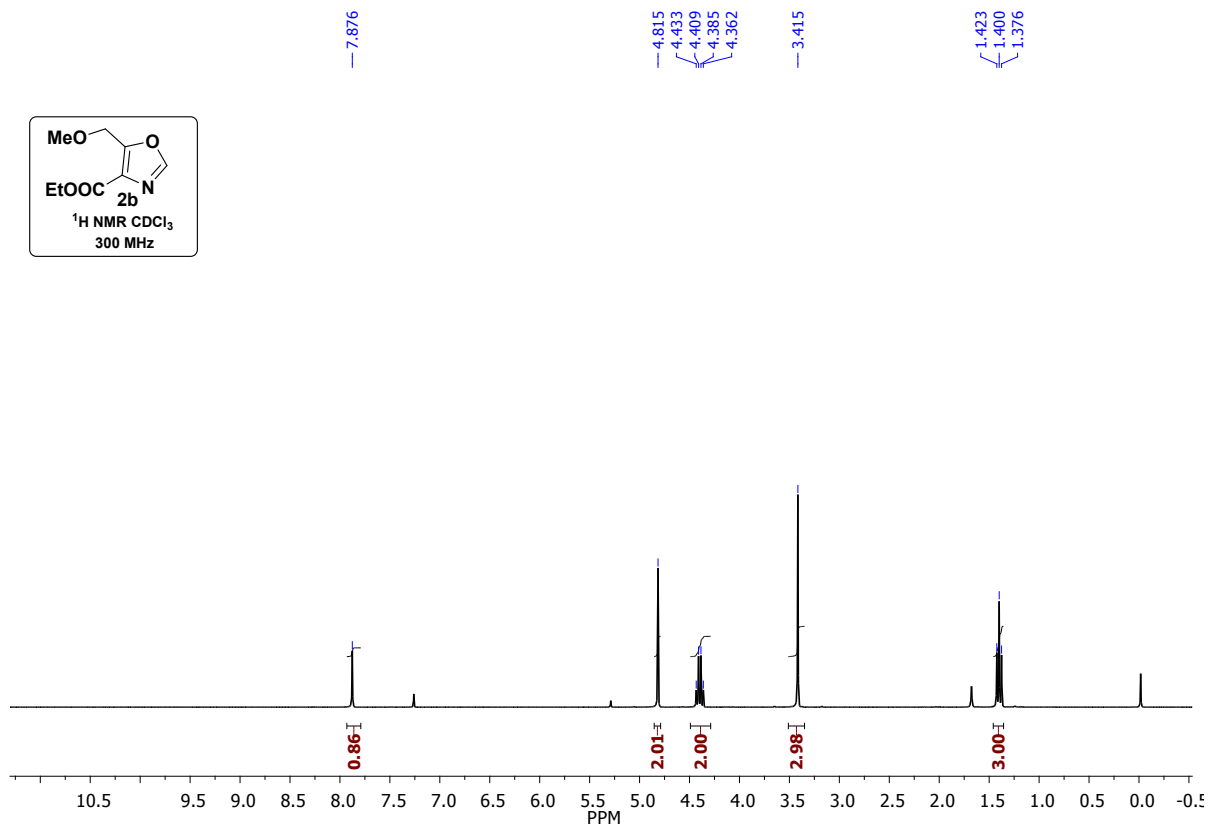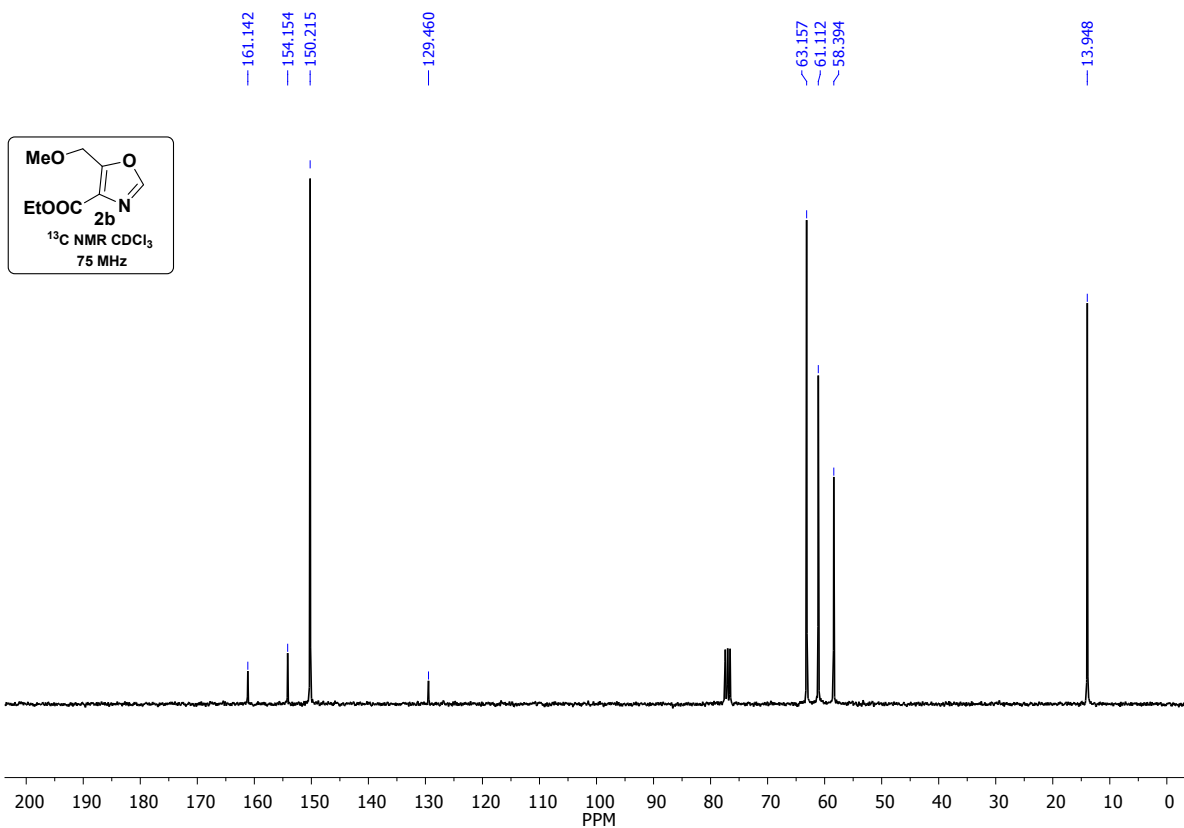



# <sup>1</sup>H and <sup>13</sup>C NMR of (2c)

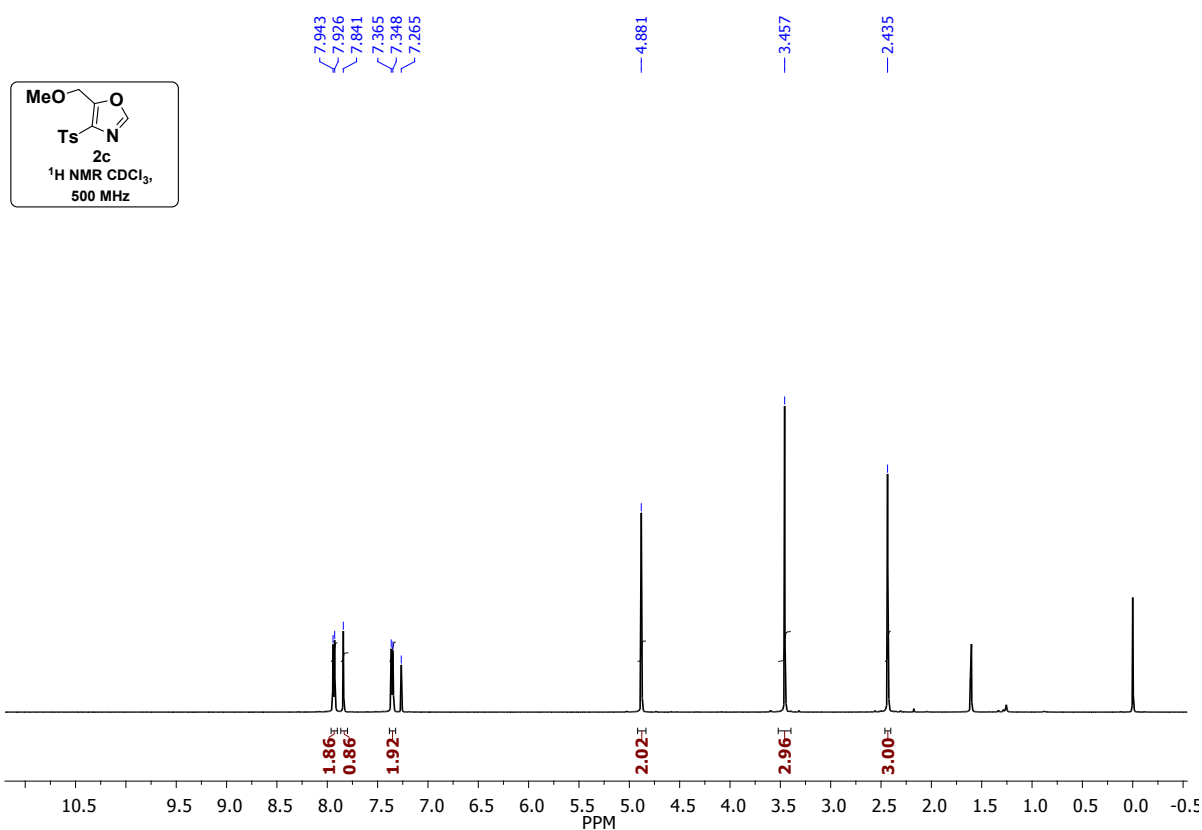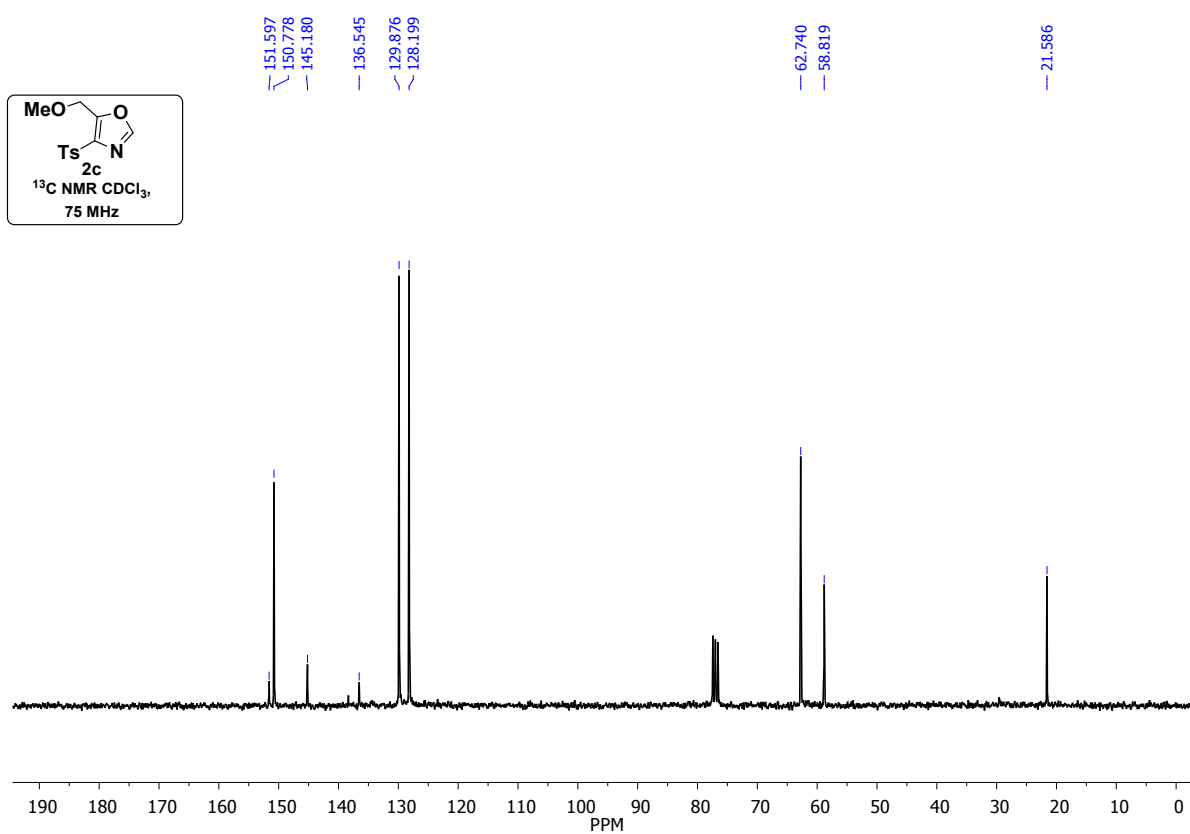

### $^1\text{H}$ and $^{13}\text{C}$ NMR of (3a)

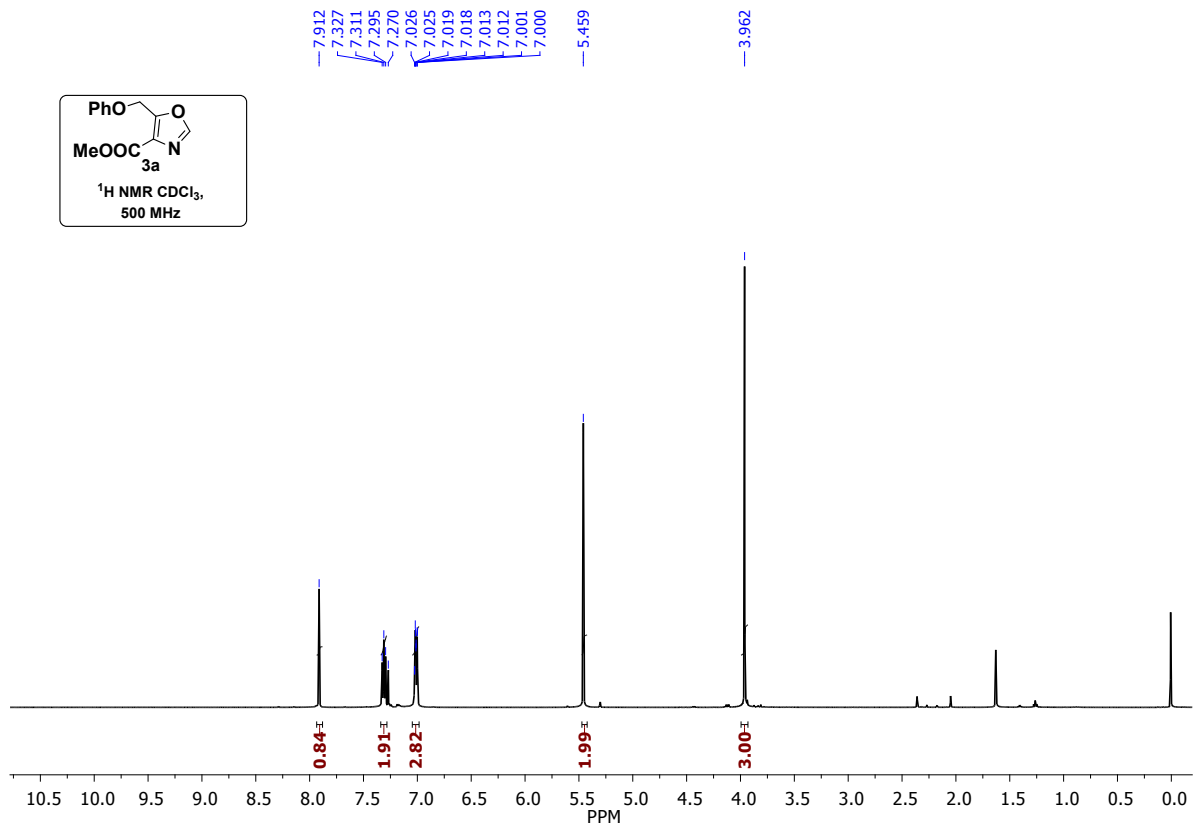

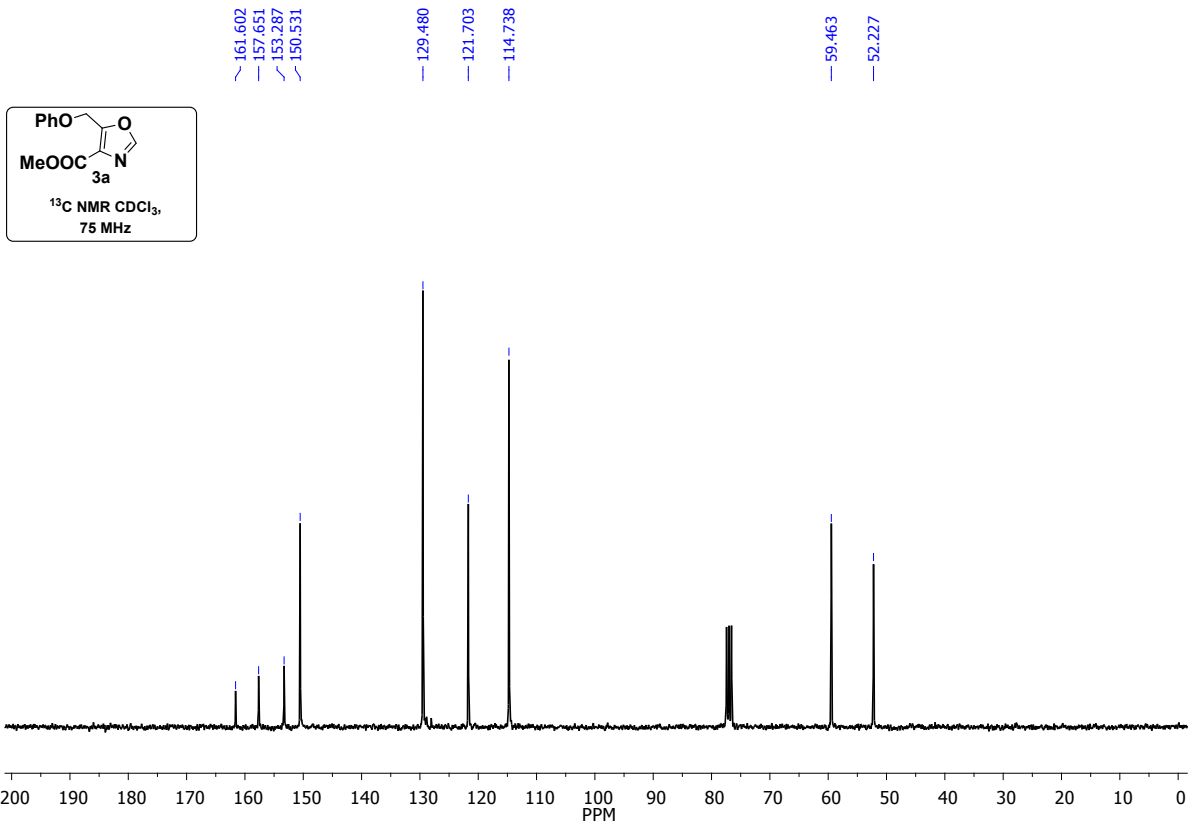

**$^1\text{H}$  and  $^{13}\text{C}$  NMR of (3b)**

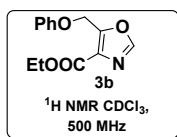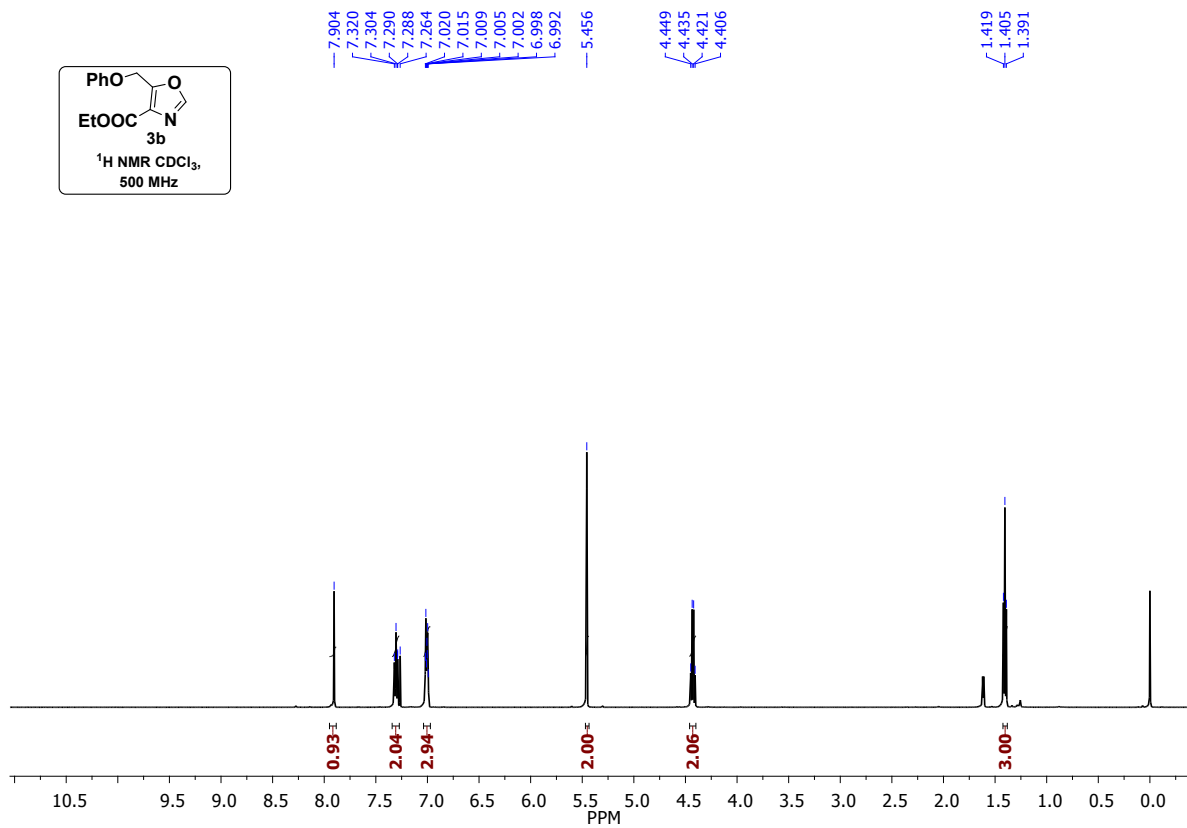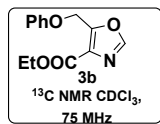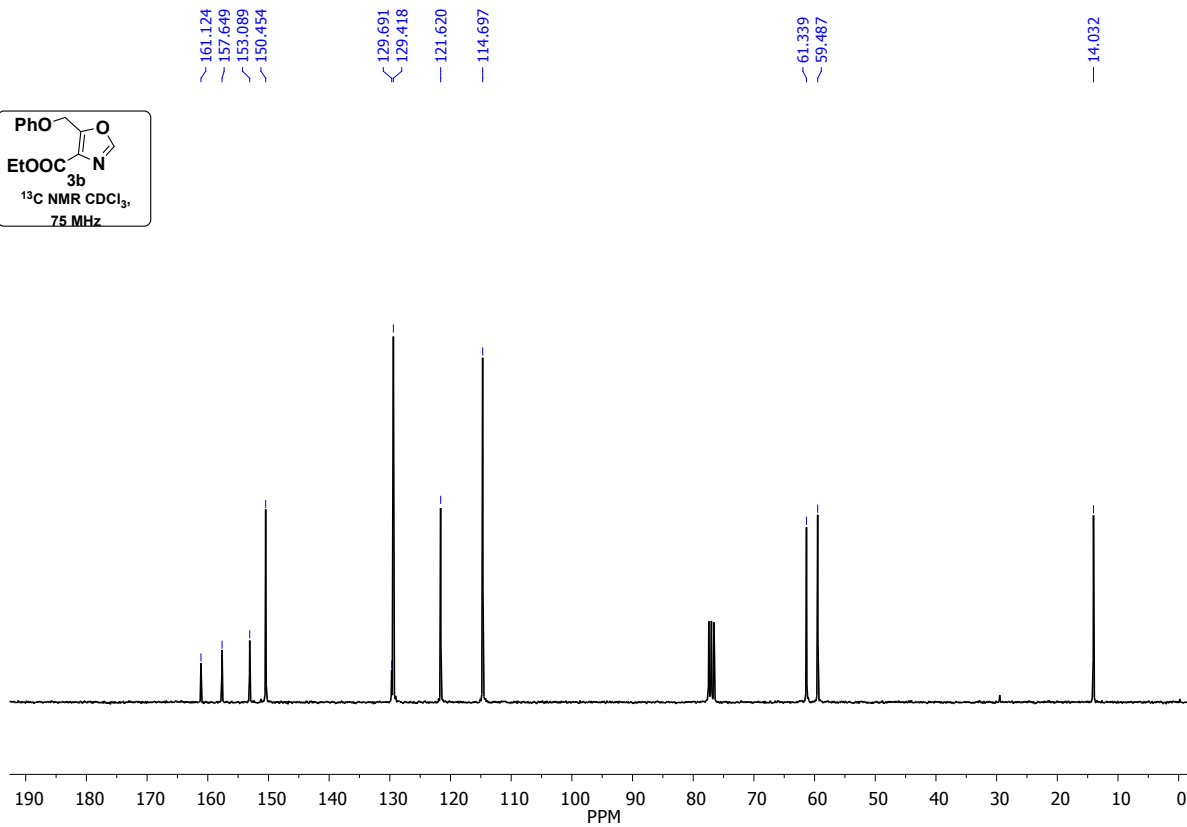

# $^1\text{H}$ and $^{13}\text{C}$ NMR of (3c)

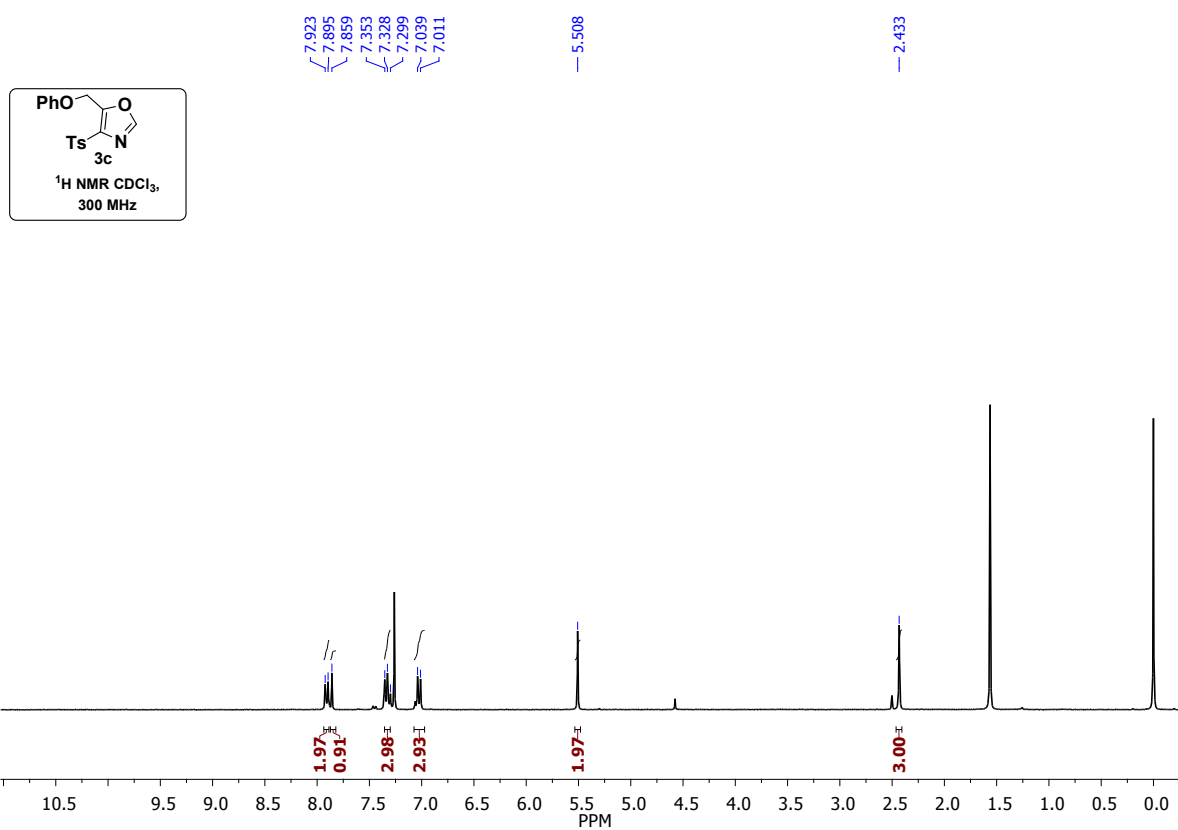

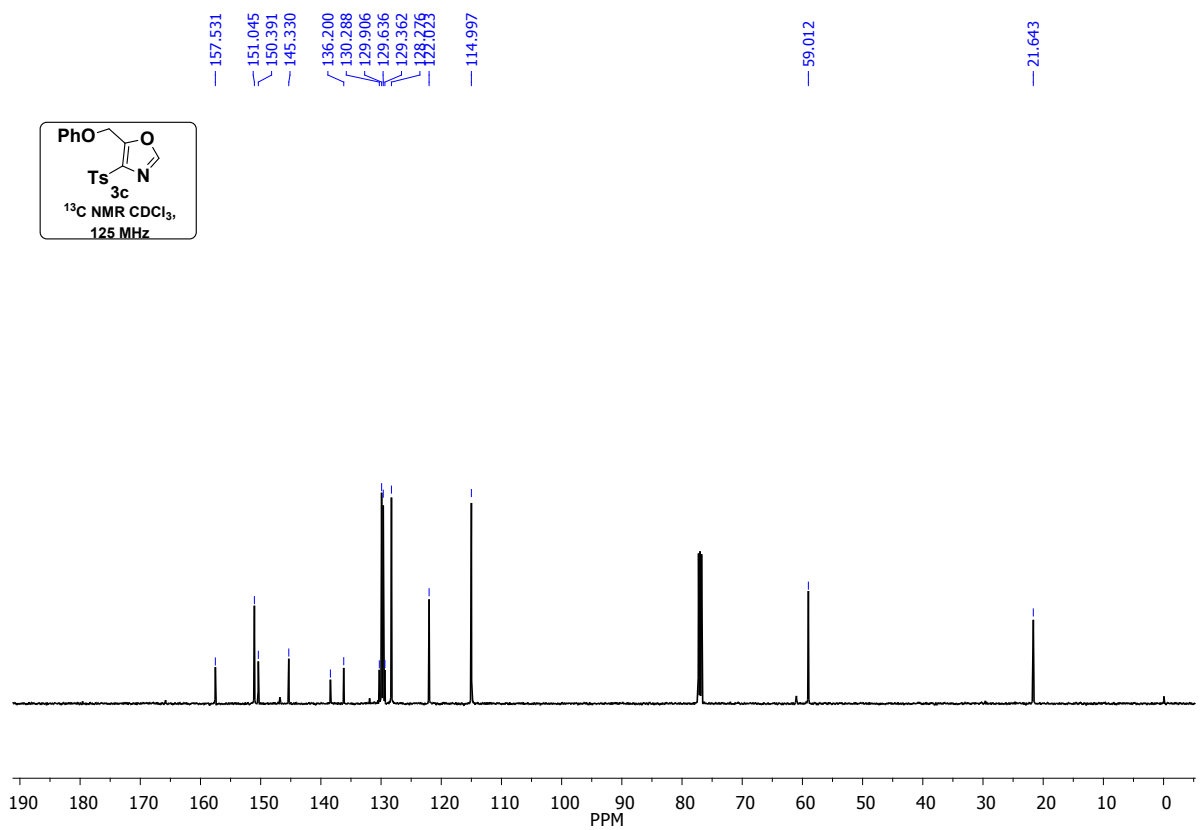

**<sup>1</sup>H and <sup>13</sup>C NMR of (4a)**

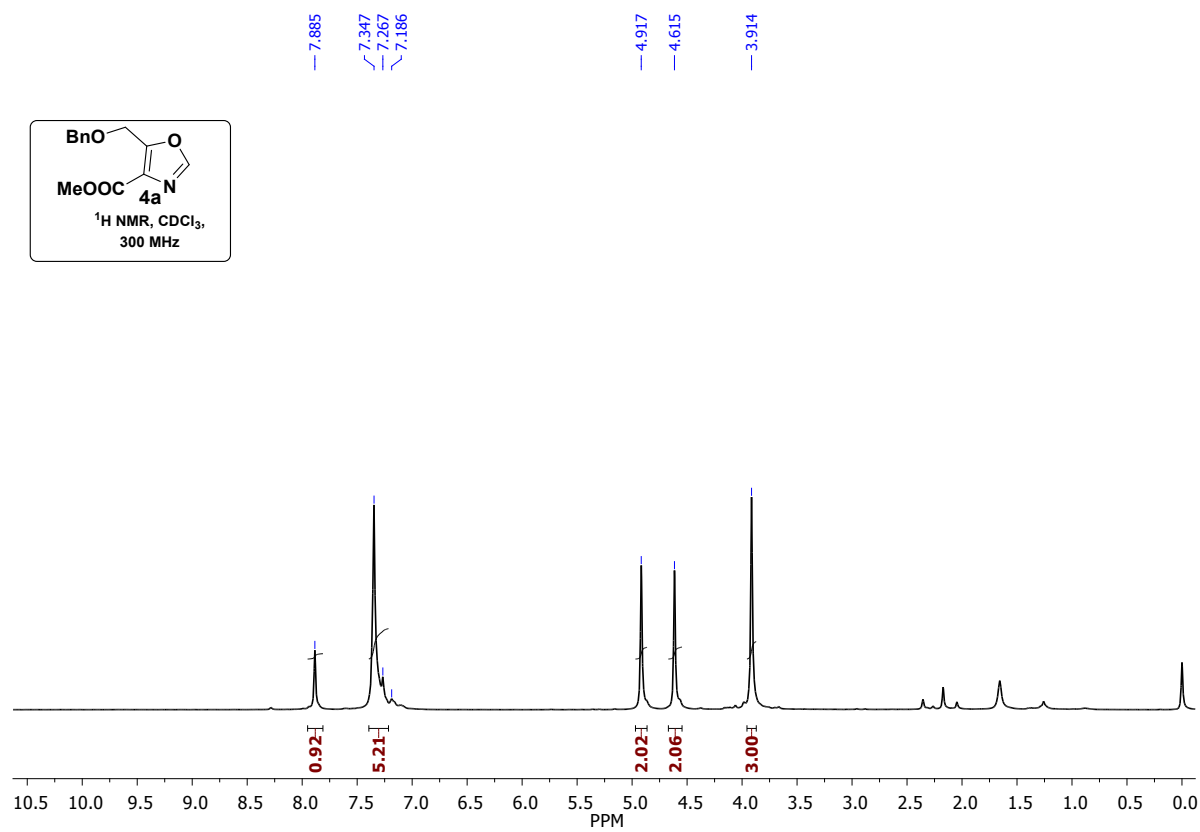

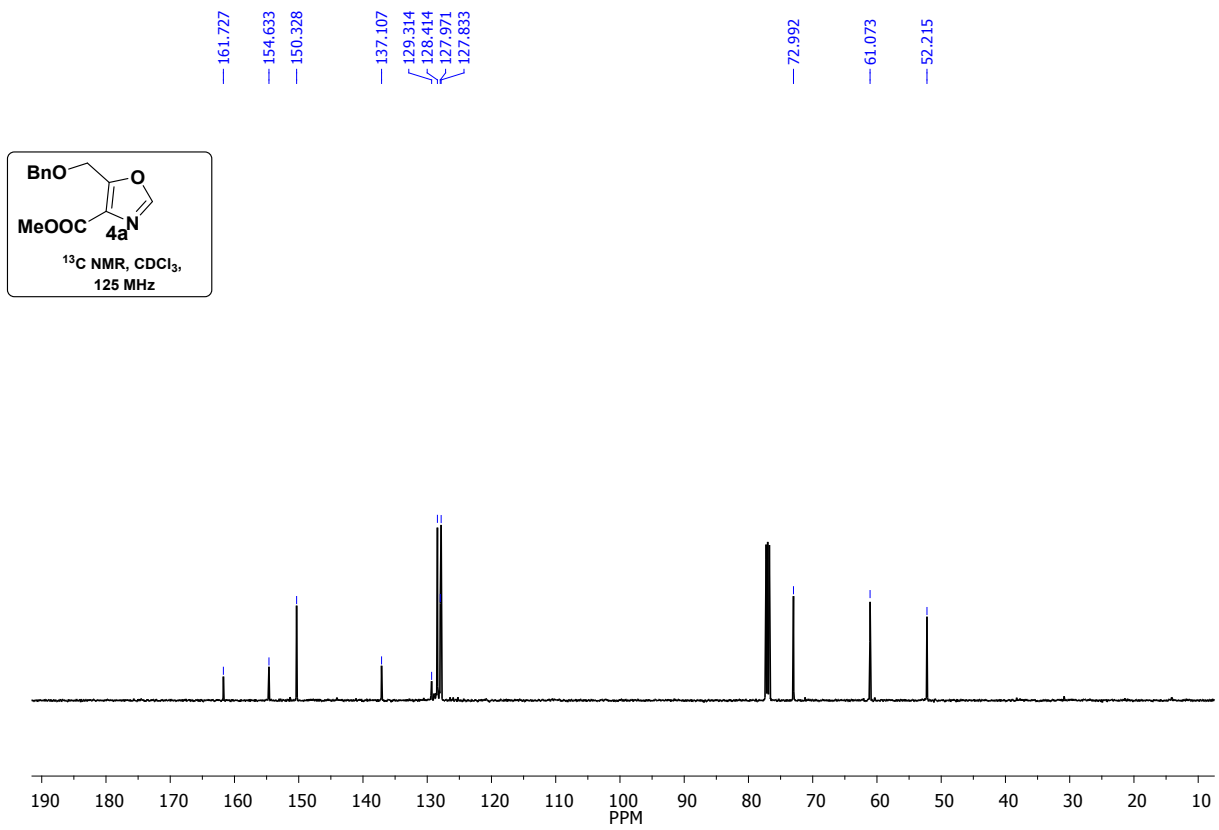

**<sup>1</sup>H and <sup>13</sup>C NMR of (4b)**

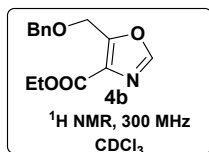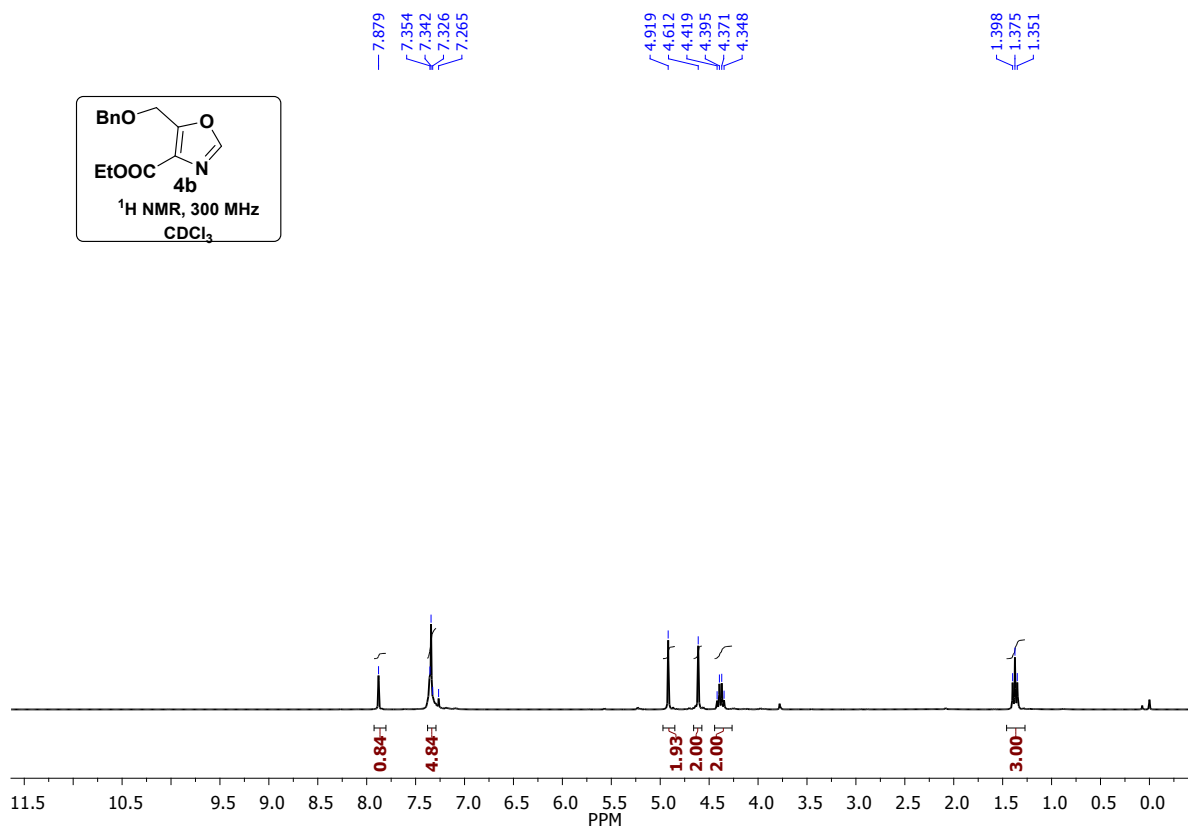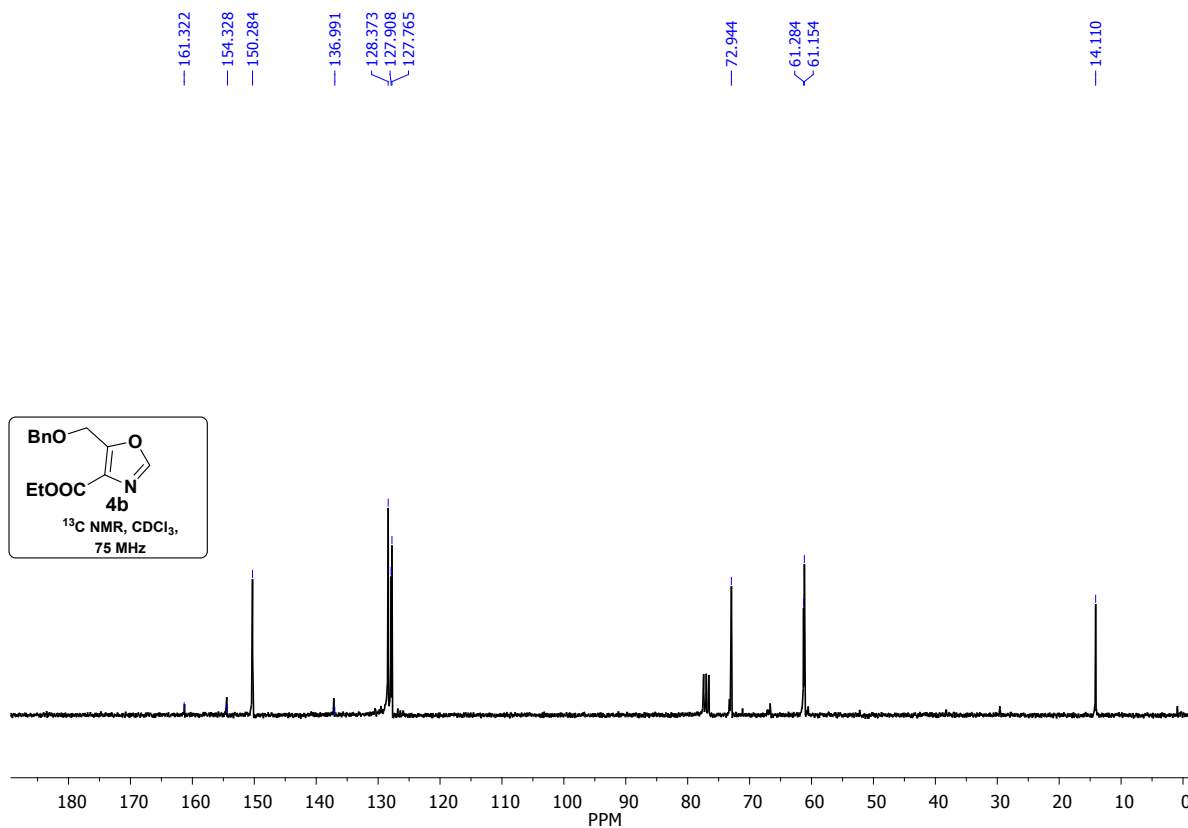

<sup>1</sup>H and <sup>13</sup>C NMR of (4c)



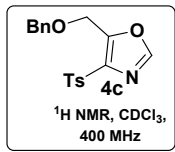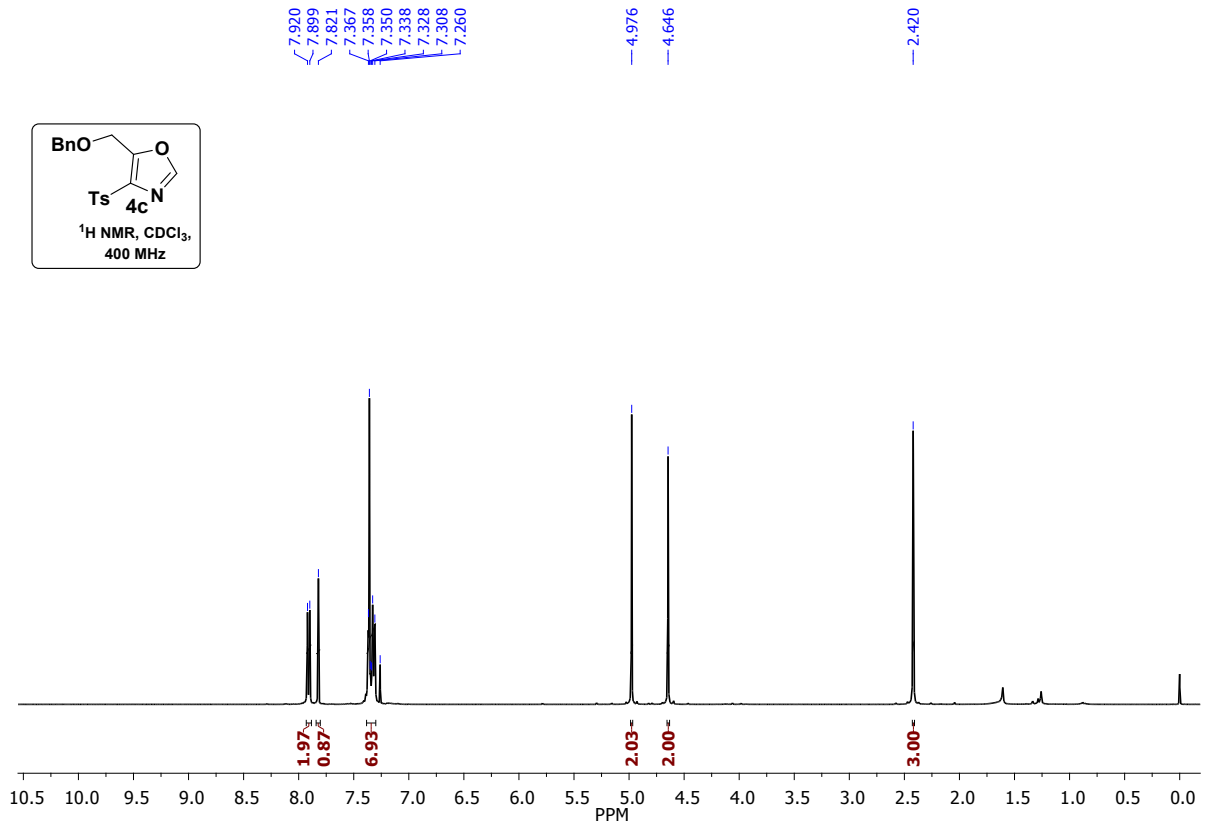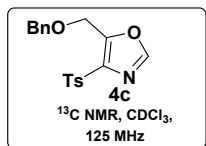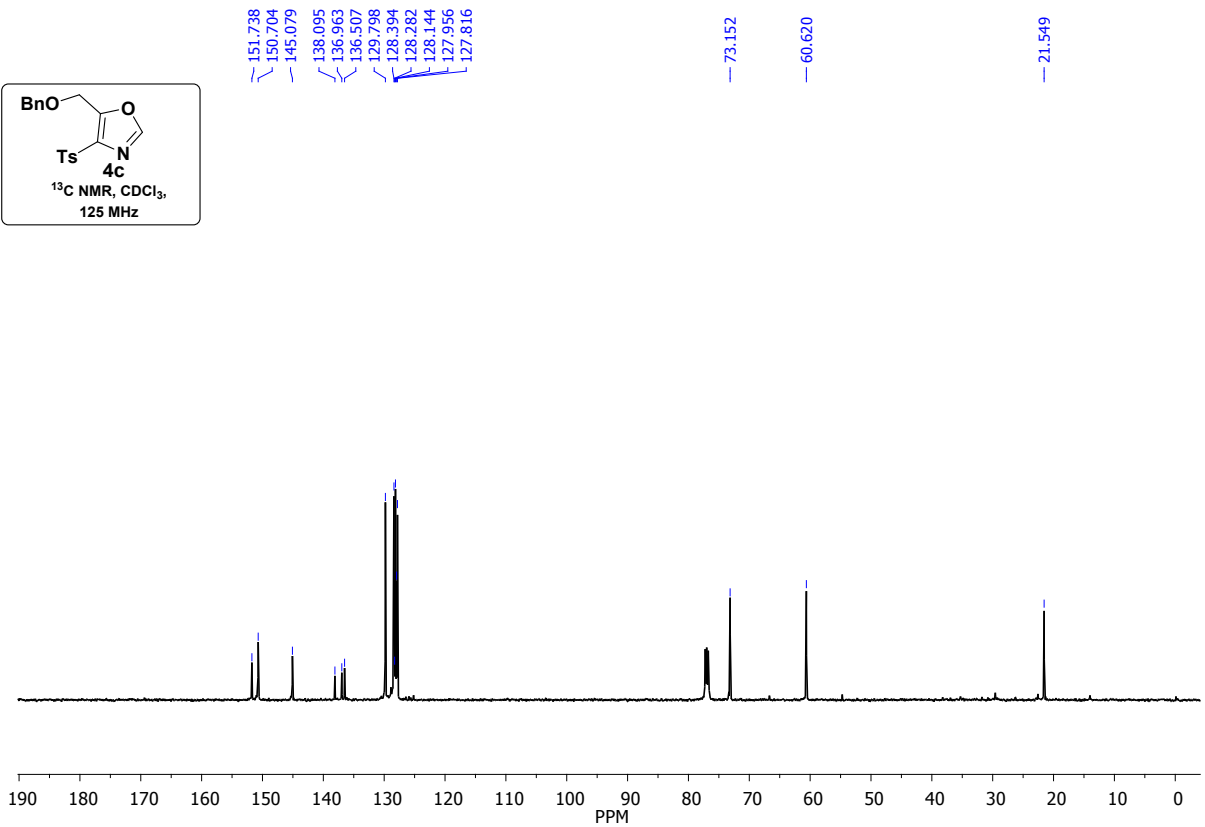

# <sup>1</sup>H and <sup>13</sup>C NMR of (5a)

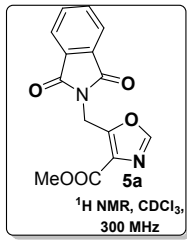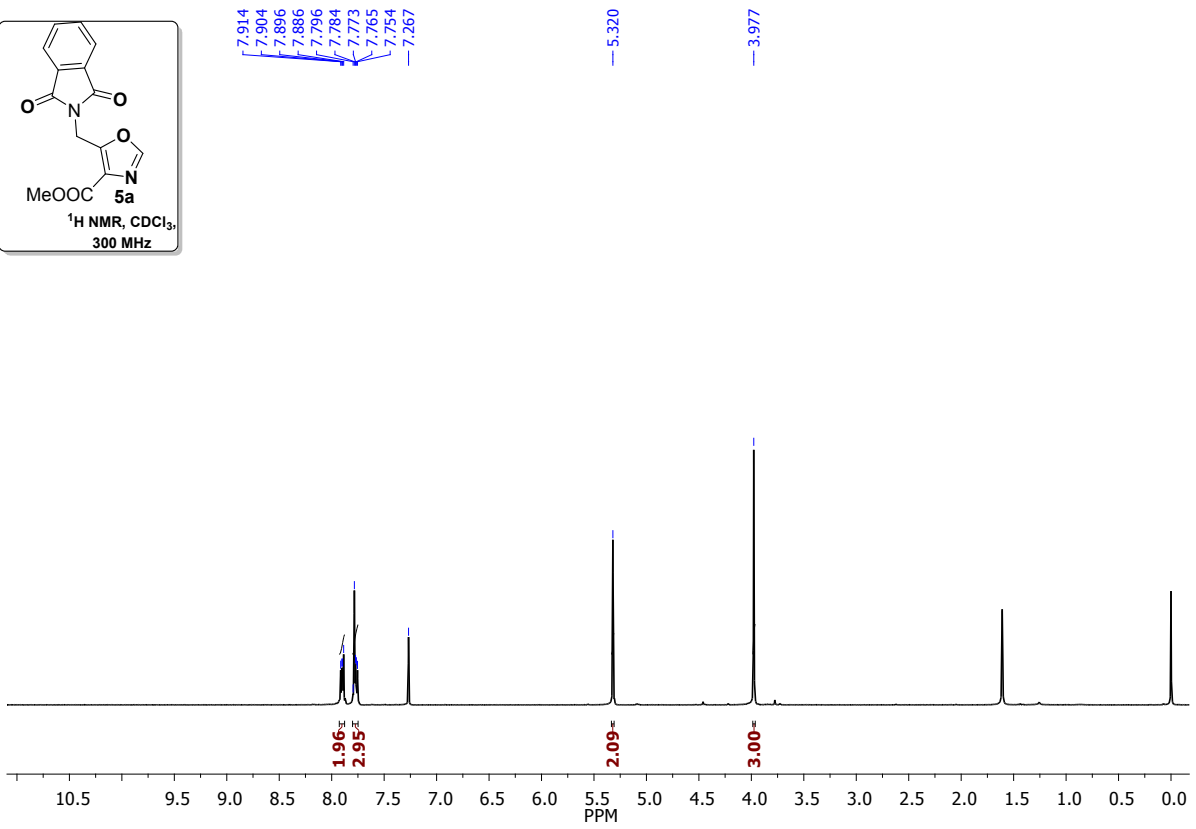

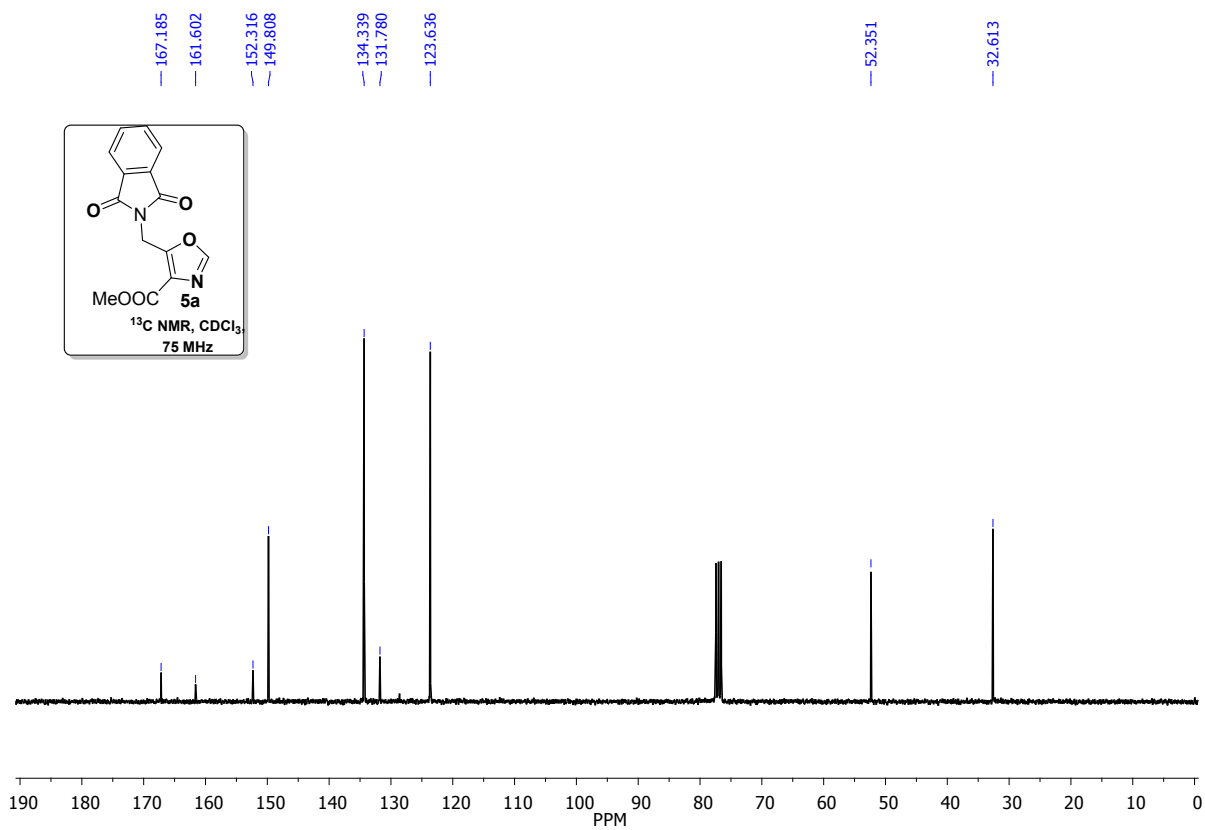

**<sup>1</sup>H and <sup>13</sup>C NMR of (5b)**

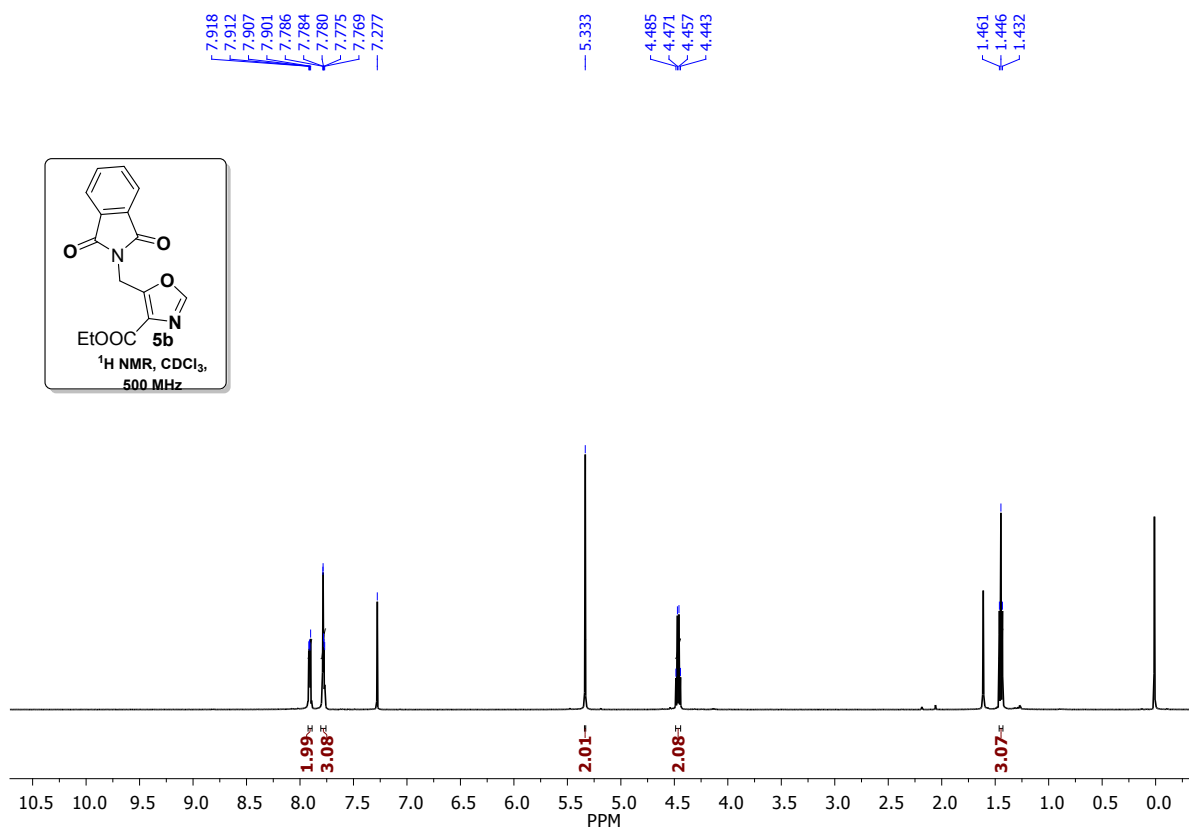

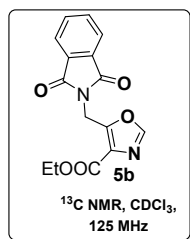

— 167.217  
— 161.419  
— 152.118  
— 149.778  
— 134.344  
— 131.785  
— 123.645  
  
— 61.542  
  
— 32.662  
  
— 14.263

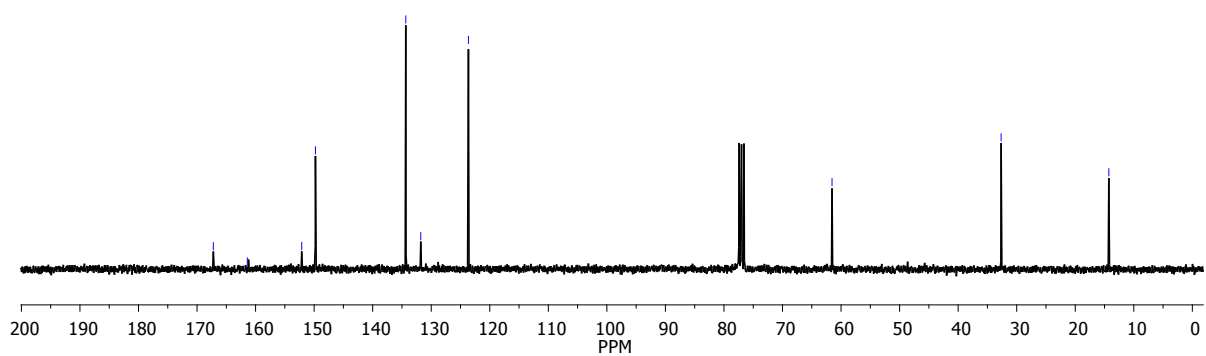

<sup>1</sup>H and <sup>13</sup>C NMR of (5c)

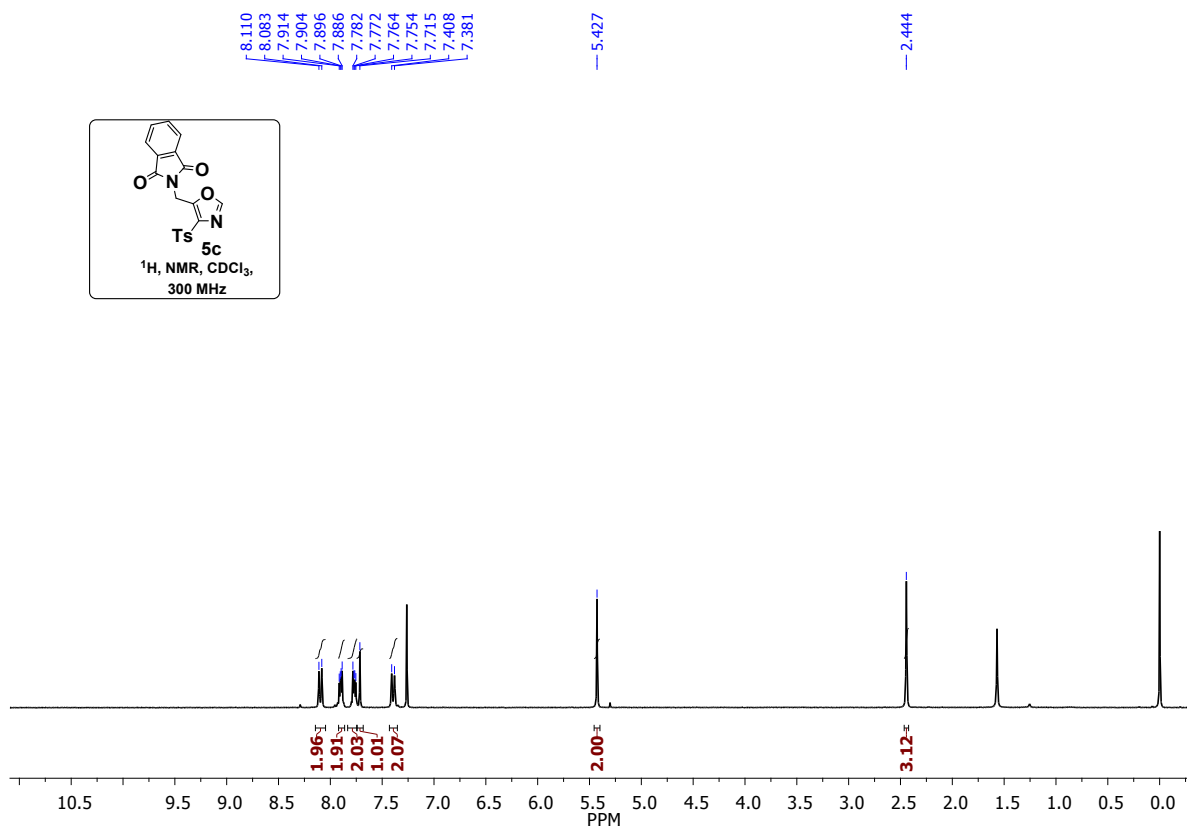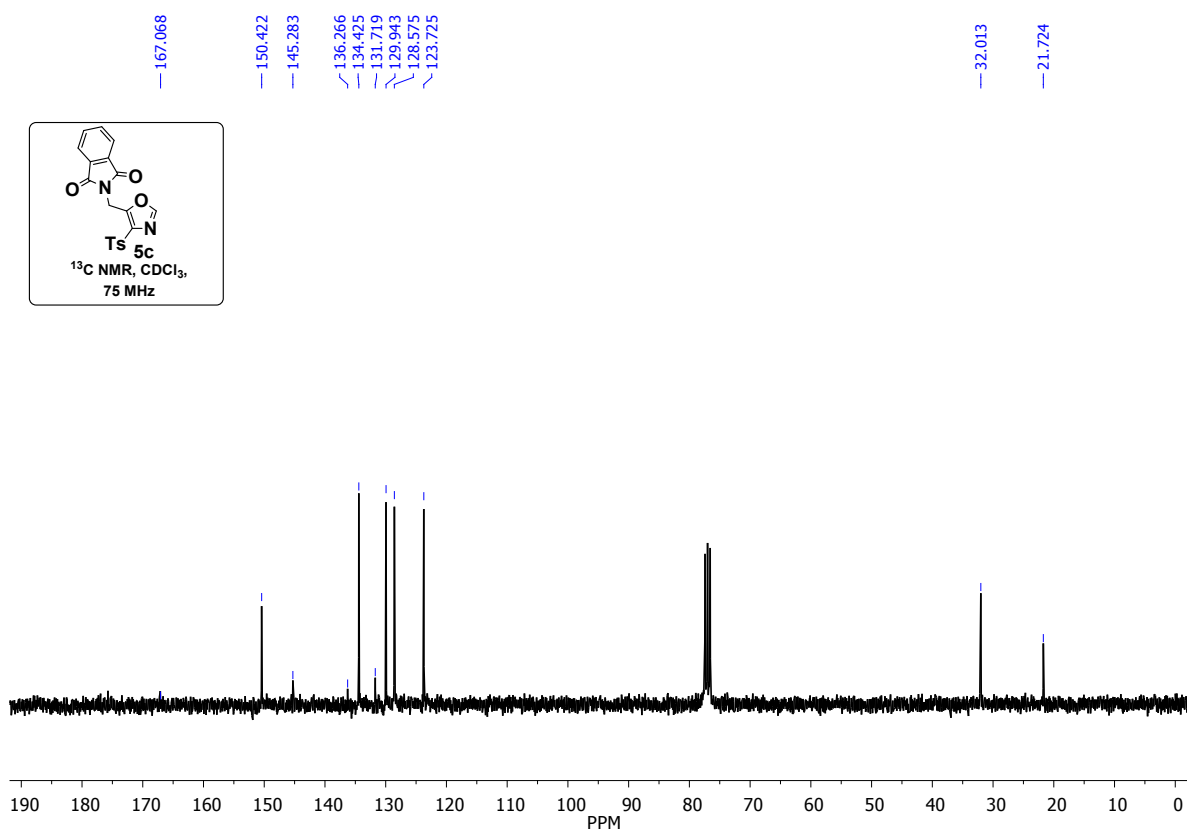

# <sup>1</sup>H and <sup>13</sup>C NMR of (6a)

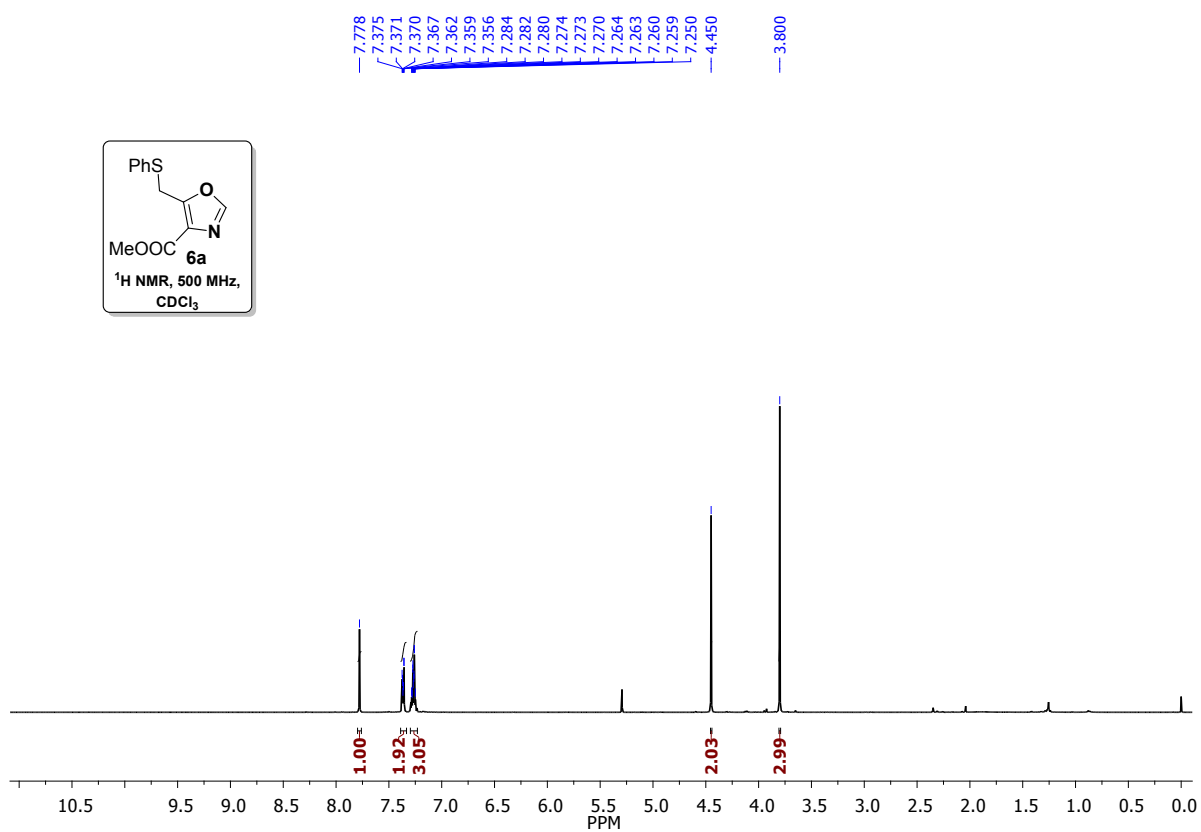

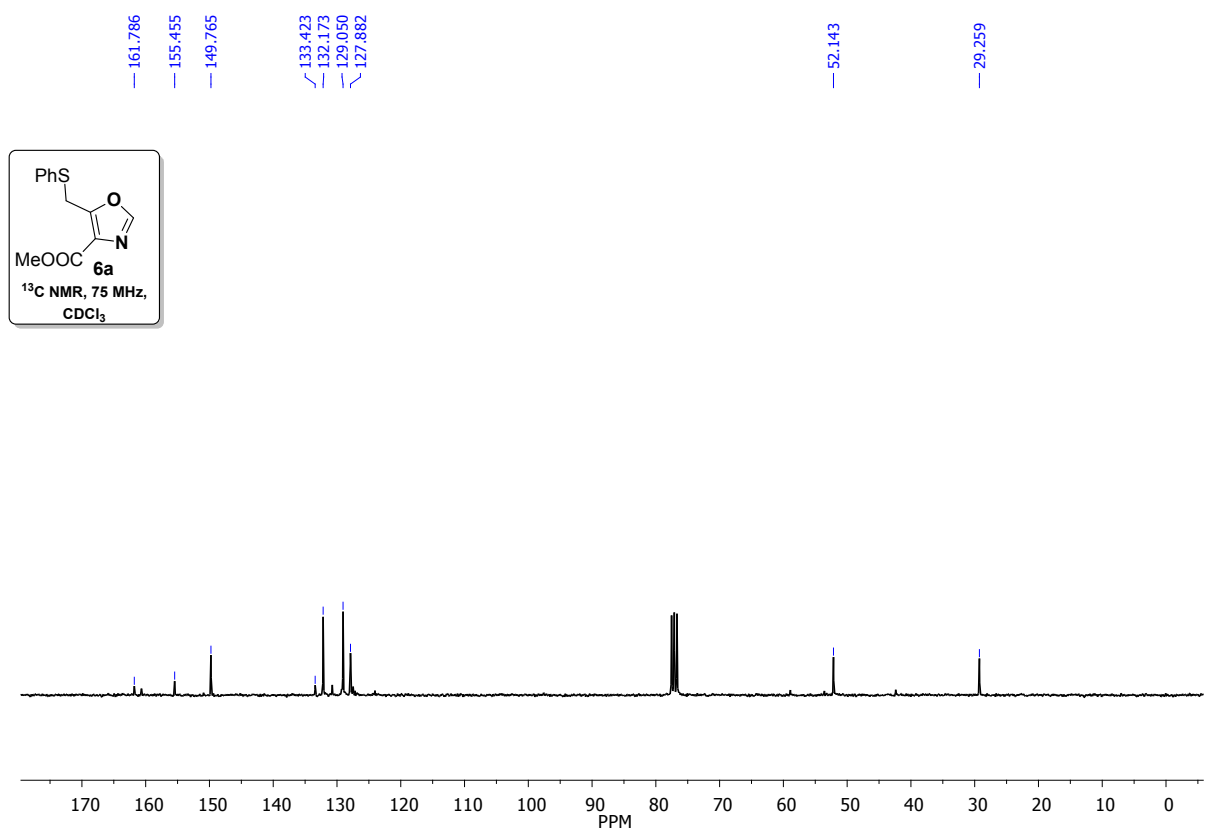

**<sup>1</sup>H and <sup>13</sup>C NMR of (6b)**

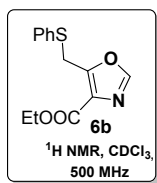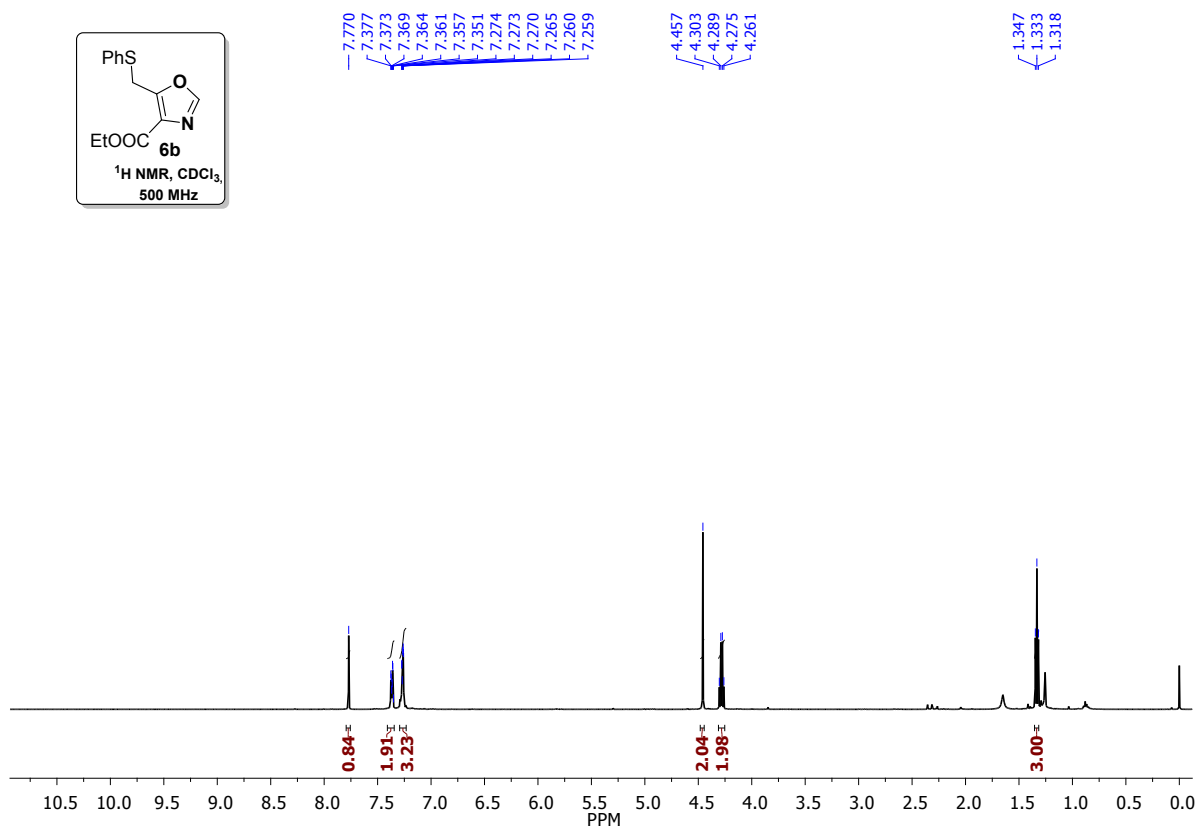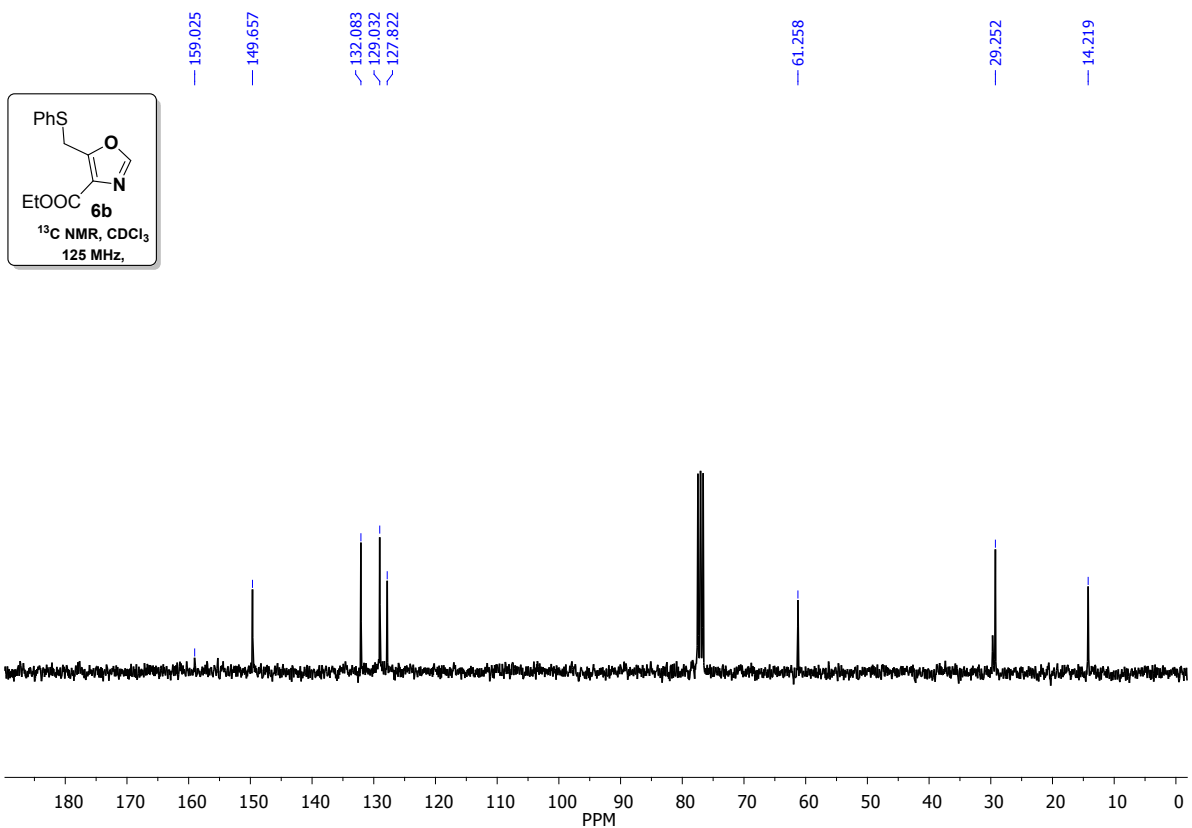



# $^1\text{H}$ and $^{13}\text{C}$ NMR of (6c)

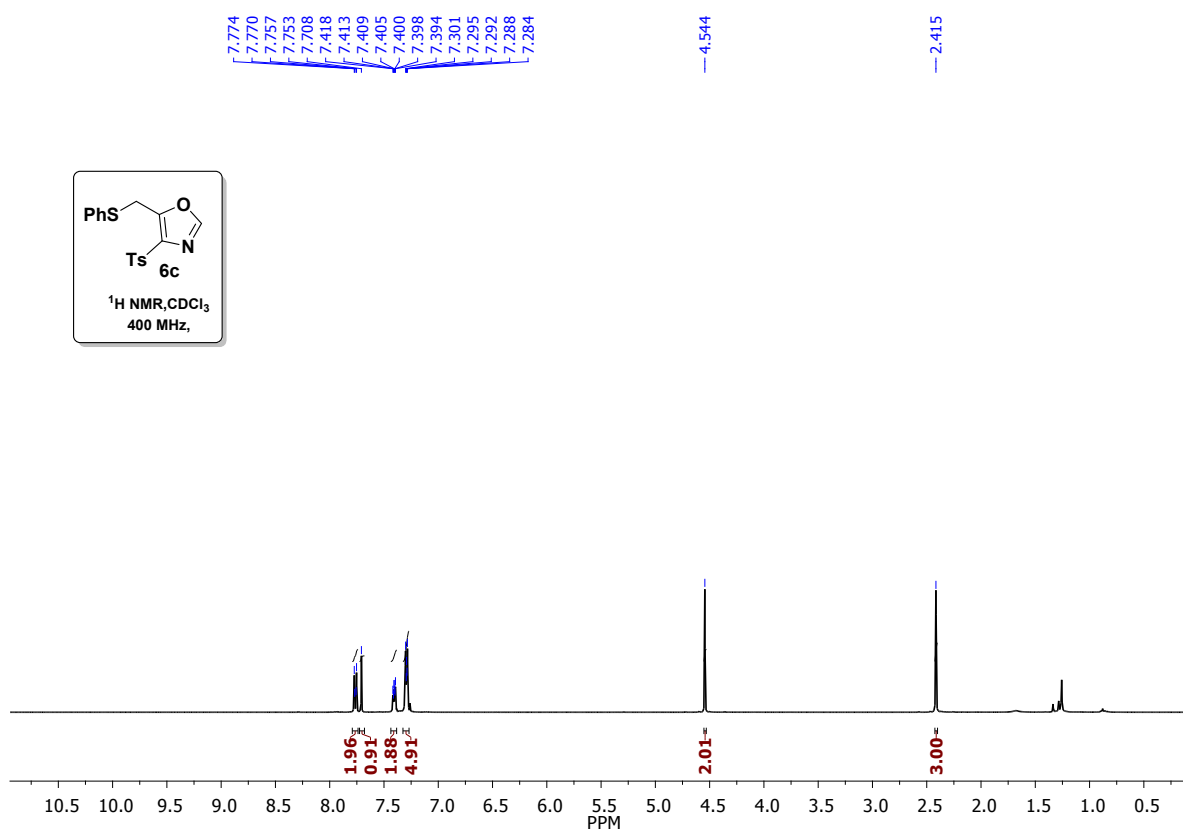

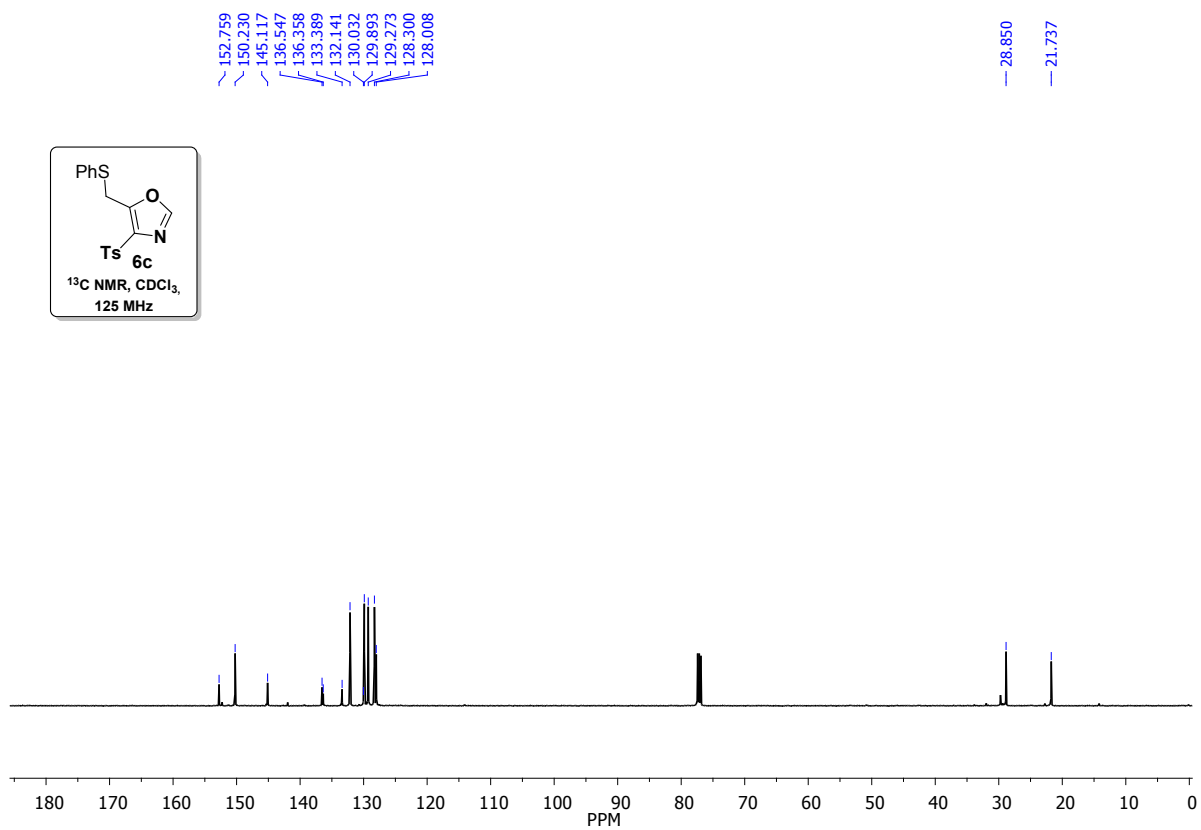

<sup>1</sup>H and <sup>13</sup>C NMR of (7)

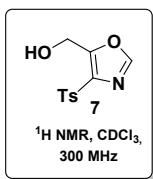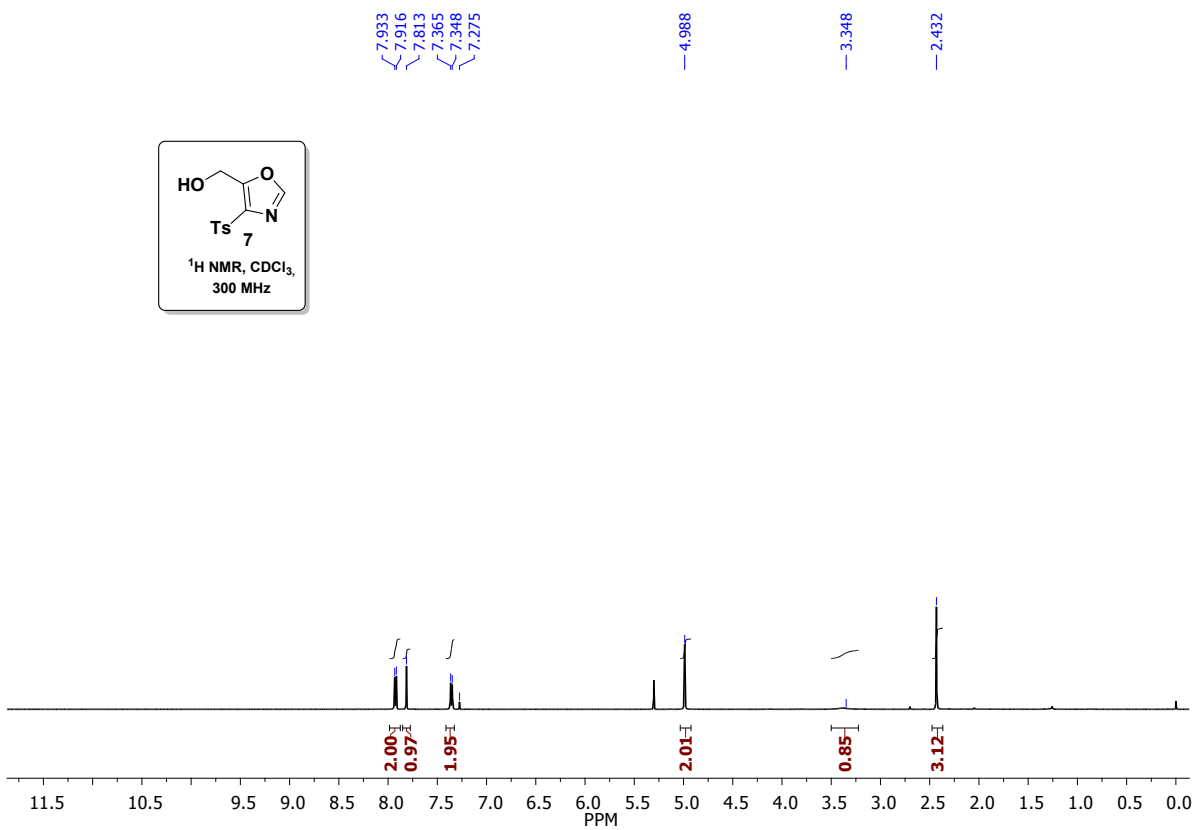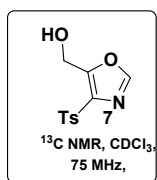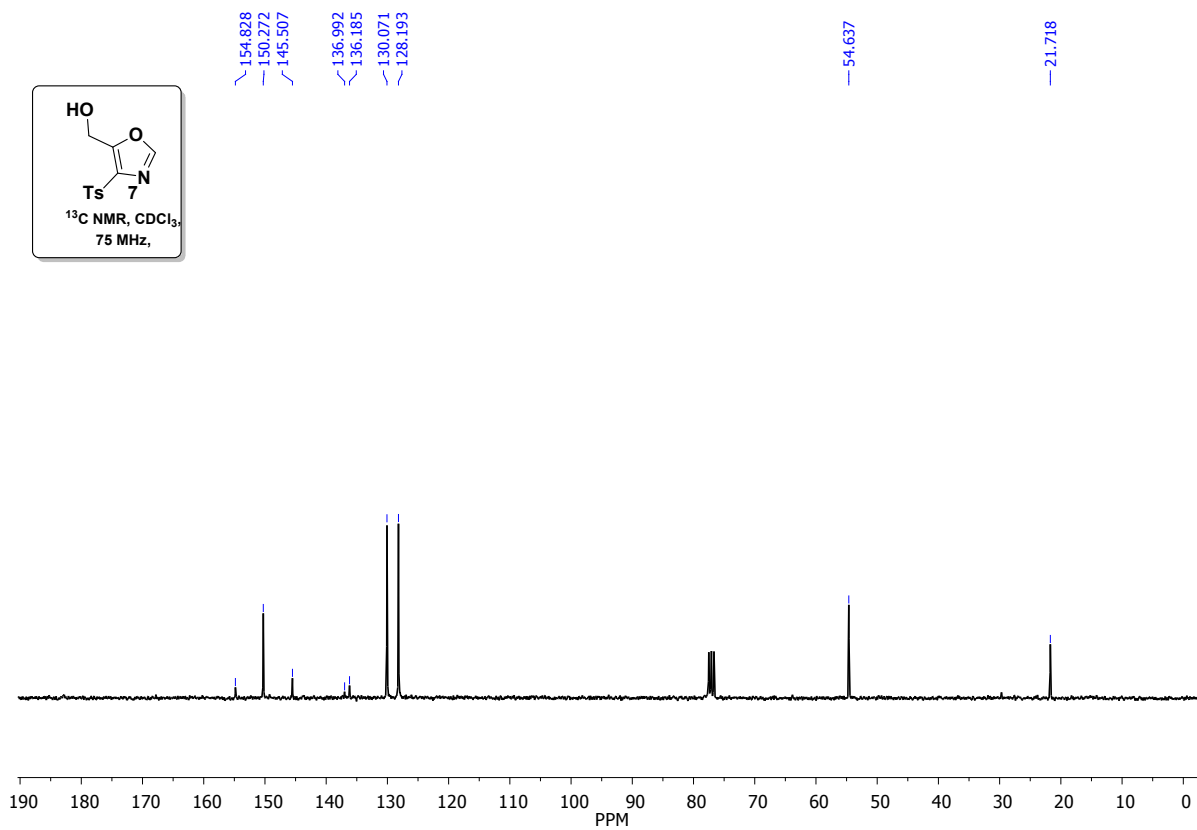

# $^1\text{H}$ and $^{13}\text{C}$ NMR of (8)

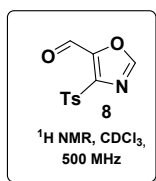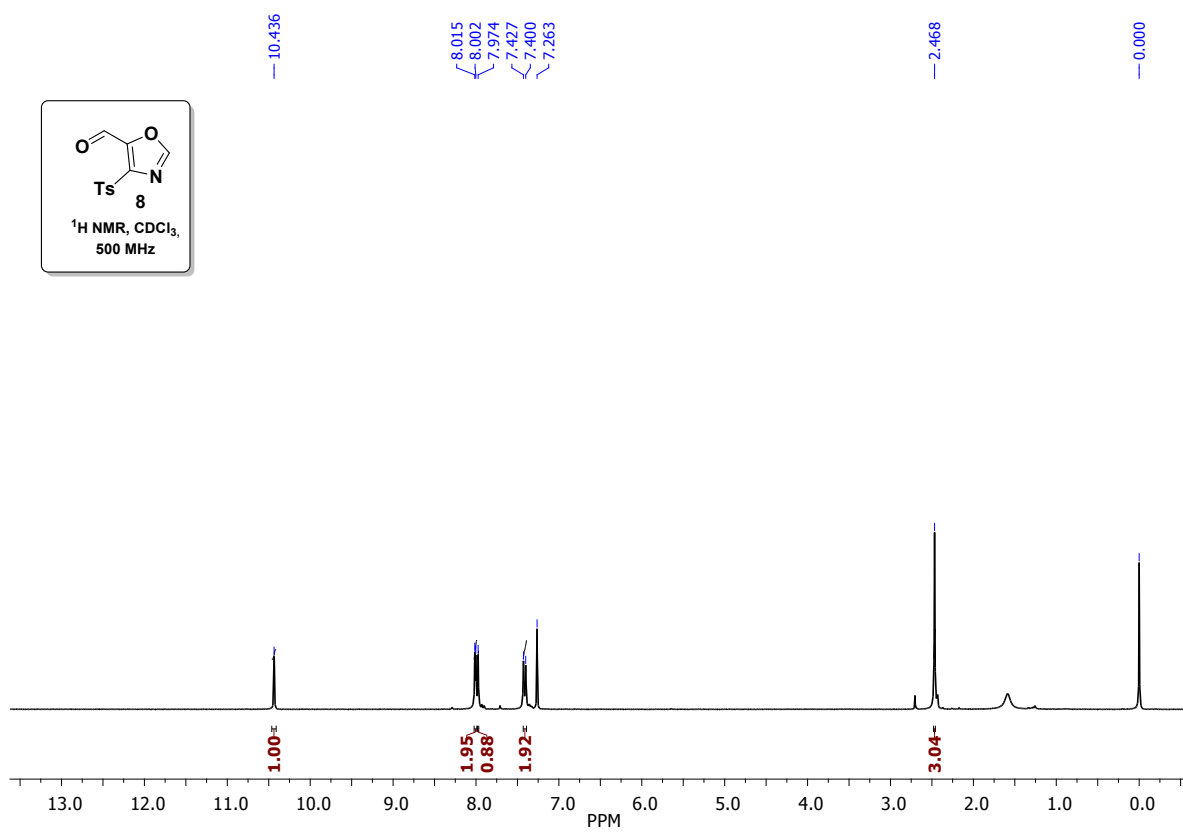

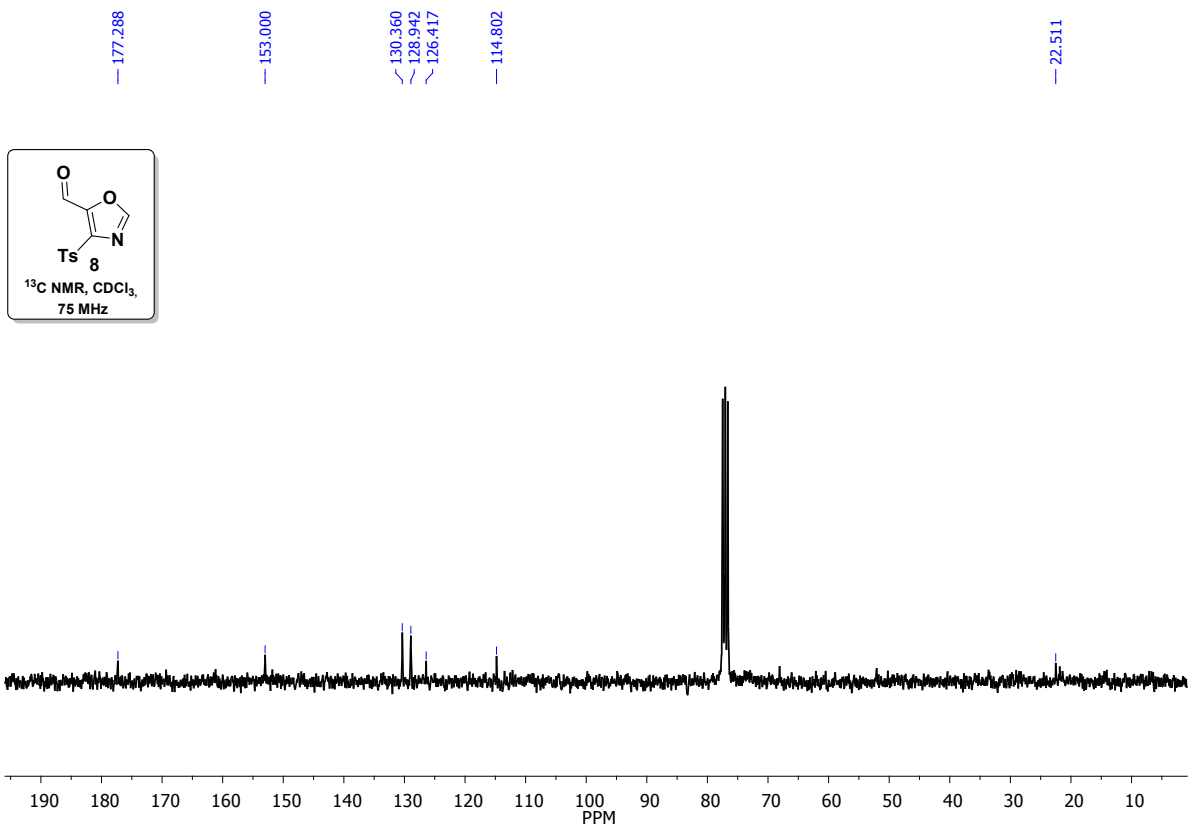

<sup>1</sup>H and <sup>13</sup>C NMR of (11)

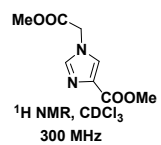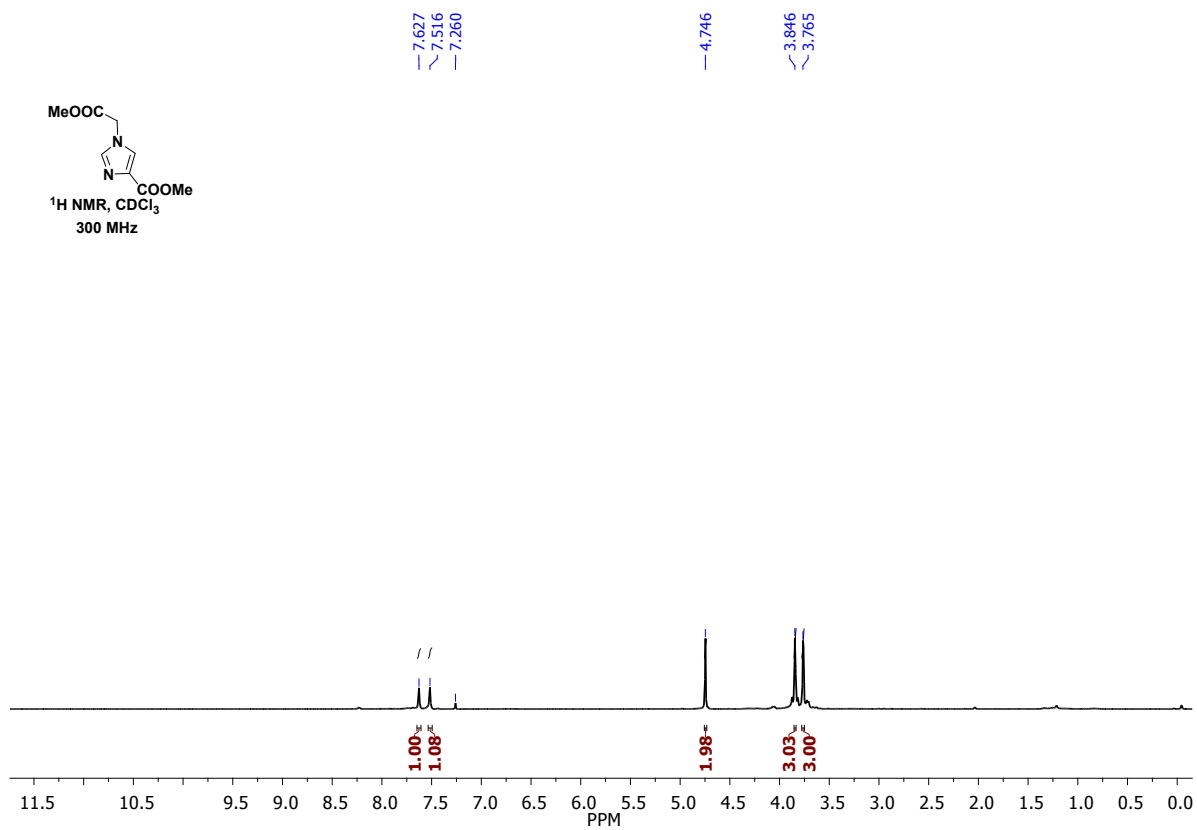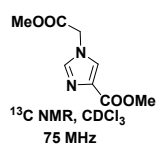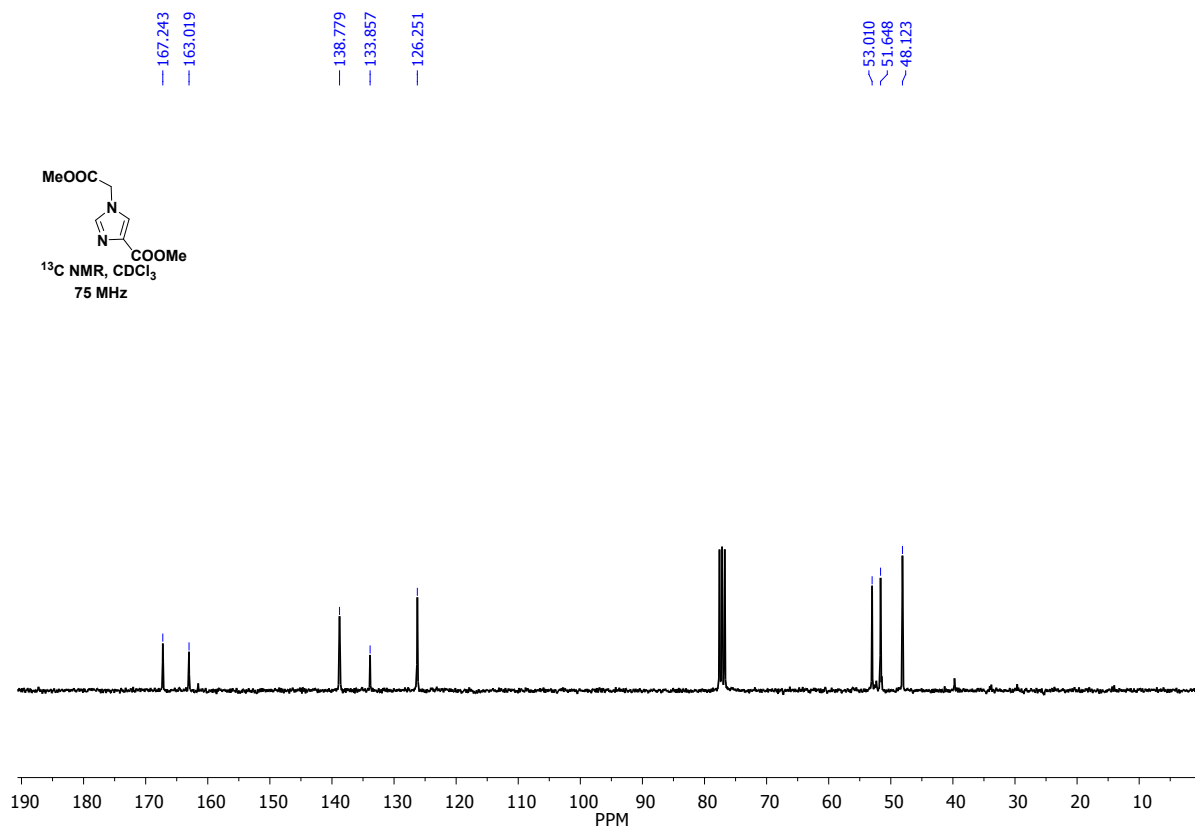

Supplement: c5ra07668d1.pdf [file c5ra07668d1.pdf]
